# Supplementary material
Source: publisher figshare collection journal article supplement (https://acs.figshare.com/ndownloader/files/4375801)
Supplement: Supplementary file 1 [file 4375801]

## Formal Total Synthesis of (±)-Estrone via the Furano Diene Approach

Ya-Ping Xue<sup>†</sup> and Wei-Dong Z. Li<sup>\*,†,‡</sup>

<sup>†</sup>State Key Laboratory of Applied Organic Chemistry, Lanzhou University, Lanzhou 730000, China

<sup>‡</sup>State Key Laboratory of Elemento-organic Chemistry, Nankai University, Tianjin 300071, China

[wqli@nankai.edu.cn](mailto:wqli@nankai.edu.cn)

### Table of contents

|                                                                                 |         |
|---------------------------------------------------------------------------------|---------|
| 1. The Diels–Alder cycloaddition of furan <b>4</b> with dimethyl maleate.....   | S2      |
| 2. Preparation of compound <b>14</b> and <b>11</b> .....                        | S3      |
| 3. Cyclization of compound <b>14</b> .....                                      | S4      |
| 4. Preparation of compound <b>18</b> .....                                      | S5      |
| 5. Preparation of compound <b>19</b> .....                                      | S6      |
| 6. Preparation of compound <b>20</b> .....                                      | S7~S8   |
| 7. Preparation of compound <b>21</b> .....                                      | S9      |
| 8. Preparation of compound <b>22</b> .....                                      | S10     |
| 9. Preparation of compound <b>23</b> .....                                      | S10~S11 |
| 10 Preparation of Torgov diene <b>24</b> .....                                  | S12     |
| 11. Preparation of compound <b>26</b> .....                                     | S12     |
| 12. The Diels–Alder cycloaddition of furan <b>26</b> with dimethyl maleate..... | S13     |
| 13. Preparation of compound <b>25</b> .....                                     | S13     |
| 14. Cyclization of compound <b>25</b> .....                                     | S14     |
| 15. Hydrogenation of compound <b>28</b> and derivatization.....                 | S15     |
| 16. Hydrogenation of compound <b>29</b> and derivatization.....                 | S17~S18 |
| 17. Dihydroxylation of compound <b>s-12</b> .....                               | S18     |
| 18. Cyclization of compound <b>14a</b> .....                                    | S19     |
| 19. Spectroscopic data of intermediates <b>18a~f</b> .....                      | S20~S21 |

## Experimental

### General

For product purification by flash column chromatography, silica gel (200~300 mesh) and petroleum ether (PET, bp. 60~90 °C) were used unless otherwise noted. All solvents were purified and dried by standard techniques, and distilled prior to use. Other commercially available reagents were used as received without further purification unless otherwise indicated. All organic extracts were dried over anhydrous sodium sulfate or magnesium sulfate. All moisture-sensitive reactions were carried out under an atmosphere of nitrogen in glassware that had been flame-dried under vacuum.  $^1\text{H}$  and  $^{13}\text{C}$  NMR spectra were recorded on a *Bruker* Avance III 400 or *Varian* Mercury-300 spectrometer with TMS as an internal reference and  $\text{CDCl}_3$  as solvent, unless otherwise indicated. IR spectra were recorded on a *Nicolet* NEXUS 670 FT-IR spectrometer as liquid film or KBr pellet. EI-MS were obtained on a HP-5988A GC/MS instrument. HRMS were acquired on a *Bruker* Daltonics APEXII 47e FT-ICR spectrometer. Melting points were measured on a *Kofler* hot stage and were uncorrected.

#### 1. The Diels–Alder cycloaddition of furan **4** with dimethyl maleate

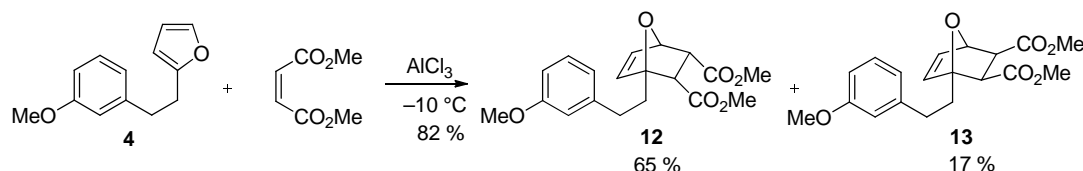

Dimethyl maleate (7.20 g, 52.50 mmol) was introduced into a flask containing powdered  $\text{AlCl}_3$  (667 mg, 5.00 mmol) at  $-10\text{ }^\circ\text{C}$  under  $\text{N}_2$ . After the resulting mixture was stirred for 10 min, furano compound **4** (10.10 g, 50.00 mmol) was added via a syringe. The reaction mixture was stirred at  $-10\text{ }^\circ\text{C}$  for 2 days, then extracted with ether, the organic layer was washed successively with water, brine, dried ( $\text{Na}_2\text{SO}_4$ ), and concentrated in vacuo. The residue was purified by flash column chromatography (PET : EtOAc = 4 : 1) to give the *endo*-adduct **12** (11.0 g, 65%) as a colorless oil and the *exo*-isomer **13** (3.20 g, 17%) as white plates.

**12**:  $R_f$  = 0.45 (PET : EtOAc = 2 : 1); IR (film):  $\nu_{\text{max}}$  3002, 2952, 1741, 1604, 1490, 1436, 1259, 1163, 1044, 909, 789, 494  $\text{cm}^{-1}$ ;  $^1\text{H}$  NMR (400 MHz,  $\text{CDCl}_3$ ):  $\delta$  7.20 (1H, t,  $J$  = 7.6 Hz, ArH), 6.76 (3H, m, ArH), 6.52 (1H, d,  $J$  = 6.0 Hz, CH=), 6.45 (1H, d,  $J$  = 6.0 Hz, CH=), 5.11 (1H, d,  $J$  = 4.4 Hz, OCH), 3.80 (3H, s, OMe), 3.63 (3H, s, OMe), 3.60 (3H, s, OMe), 3.58 (1H, d,  $J$  = 4.8 Hz, CH), 3.13 (1H, d,  $J$  = 10.0 Hz, CH), 2.76 (2H, m,  $\text{CH}_2$ ), 2.45 (1H, m,  $\text{CH}_2$ ), 2.15 (1H, m,  $\text{CH}_2$ ) *ppm*;  $^{13}\text{C}$  NMR (100 MHz,  $\text{CDCl}_3$ ):  $\delta$  171.1, 170.6, 159.6, 143.1, 136.9, 135.2, 129.3, 120.5, 113.9, 111.2, 91.2, 79.4, 55.0, 51.7, 51.7, 51.4, 50.5, 33.5, 30.90 *ppm*; HRMS (ESI)  $m/z$ : calcd for  $\text{C}_{19}\text{H}_{26}\text{O}_6\text{N}$  364.1755, found for  $[\text{M}+\text{NH}_4]^+$  364.1754

**13**:  $R_f$  = 0.20 (PET : EtOAc = 2 : 1); mp. 109–110  $^\circ\text{C}$ ; IR (film):  $\nu_{\text{max}}$  2949, 2844, 1743, 1601, 1436, 1261, 1215, 1159, 1039, 922, 786, 698  $\text{cm}^{-1}$ ;  $^1\text{H}$  NMR (400 MHz,  $\text{CDCl}_3$ ):  $\delta$  7.20 (1H, t,  $J$  = 7.6 Hz, ArH), 6.76 (3H, m, ArH), 6.47 (1H, d,  $J$  = 5.6 Hz, CH=), 6.30 (1H, d,  $J$  = 5.6 Hz, CH=), 5.44 (1H, s, OCH), 3.80 (3H, s, OMe), 3.69 (3H, s, OMe), 3.67 (3H, s, OMe), 2.97 (1H, d,  $J$  = 9.2 Hz, CH), 2.84 (1H, d,  $J$  = 9.2 Hz, CH), 2.83–2.80 (1H, m,  $\text{CH}_2$ ), 2.74–2.70 (1H, m,  $\text{CH}_2$ ), 2.21–2.13 (2H, m,  $\text{CH}_2$ ) *ppm*;  $^{13}\text{C}$  NMR (100 MHz,  $\text{CDCl}_3$ ):  $\delta$  171.6, 171.4, 159.5, 143.0, 137.9, 137.4, 129.3,

120.6, 113.9, 111.2, 91.2, 79.1, 54.9, 52.1, 51.9, 50.0, 49.8, 31.5, 31.4 *ppm*. HRMS (ESI) *m/z*: calcd for C<sub>19</sub>H<sub>26</sub>O<sub>6</sub>N 364.1755, found for [M+NH<sub>4</sub>]<sup>+</sup> 364.1748

## 2. Preparation of compound **14**

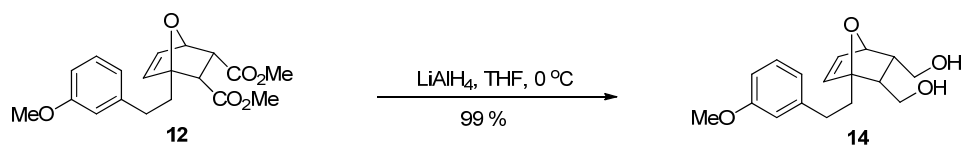

To a suspension of powdered LiAlH<sub>4</sub> (1.70 g, 45.00 mmol) in 40 mL of dry THF at 0 °C was added a solution of compound **12** (14.20 g, 41.00 mmol) in dry THF (20 mL) under N<sub>2</sub>. After being stirred for 10 min at 0 °C, the reaction mixture was quenched with 5 mL of water, extracted with ether, the organic layer was washed successively with water and brine, dried (Na<sub>2</sub>SO<sub>4</sub>), and concentrated in vacuo. The residue was purified by flash column chromatography (PET : EtOAc = 1 : 2) to give compound **14** (11.90 g, 99%) as a colorless oil. **14**: *R*<sub>f</sub> = 0.15 (PET : EtOAc = 1 : 2); IR (film):  $\nu_{\text{max}}$  3359, 2934, 1603, 1490, 1456, 1316, 1258, 1155, 1039, 912, 782, 727, 698, 574 cm<sup>-1</sup>; <sup>1</sup>H NMR (400 MHz, CDCl<sub>3</sub>):  $\delta$  7.20 (1H, t, *J* = 7.6 Hz, ArH), 6.76 (3H, m, ArH), 6.30 (1H, d, *J* = 5.6 Hz, CH=), 6.11 (1H, d, *J* = 5.6 Hz, CH=), 4.80 (1H, d, *J* = 3.6 Hz, OCH), 4.30 (2H, br s, OH), 3.79 (3H, s, OMe), 3.55 (2H, d, *J* = 10.8 Hz, OCH<sub>2</sub>), 3.35 (2H, m, OCH<sub>2</sub>), 2.78 (2H, m, CH<sub>2</sub>), 2.64 (1H, m, CH<sub>2</sub>), 2.42–2.25 (2H, m, CH), 2.11 (1H, m, CH<sub>2</sub>) *ppm*; <sup>13</sup>C NMR (100 MHz, CDCl<sub>3</sub>):  $\delta$  159.5, 143.4, 136.5, 135.1, 129.3, 120.5, 113.9, 111.1, 90.5, 79.2, 60.8, 60.5, 55.0, 48.4, 46.7, 33.8, 30.9 *ppm*; HRMS (ESI) *m/z*: calcd for C<sub>17</sub>H<sub>26</sub>O<sub>4</sub>N 308.1856, found for [M+NH<sub>4</sub>]<sup>+</sup> 308.1864

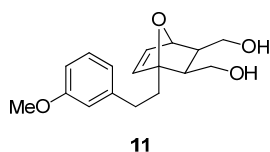

Compound **11** was prepared by LiAlH<sub>4</sub> reduction of compound **13** similarly as above in 98% yield as a colorless oil. **11**: *R*<sub>f</sub> = 0.15 (PET : EtOAc = 1 : 2); IR (film):  $\nu_{\text{max}}$  3358, 2930, 1602, 1490, 1457, 1259, 1156, 1038, 784, 701 cm<sup>-1</sup>; <sup>1</sup>H NMR (400 MHz, CDCl<sub>3</sub>):  $\delta$  7.20 (1H, t, *J* = 8.0 Hz, ArH), 6.80–6.72 (3H, m, ArH), 6.35 (1H, d, *J* = 5.2 Hz, CH=), 6.22 (1H, t, *J* = 5.6 Hz, CH=), 4.69 (2H, br s, OH), 4.58 (1H, s, OCH), 3.78 (3H, s, OMe), 3.87–3.68 (4H, m, OCH<sub>2</sub>), 2.73–2.66 (2H, m, CH<sub>2</sub>), 2.15–1.93 (4H, m) *ppm*; <sup>13</sup>C NMR (100 MHz, CDCl<sub>3</sub>):  $\delta$  159.4, 143.4, 137.7, 135.9, 129.3, 120.5, 113.9, 111.0, 90.4, 80.8, 62.8, 60.0, 54.9, 44.5, 44.1, 31.6, 31.5 *ppm*

## 3. Cyclization of compound **14**

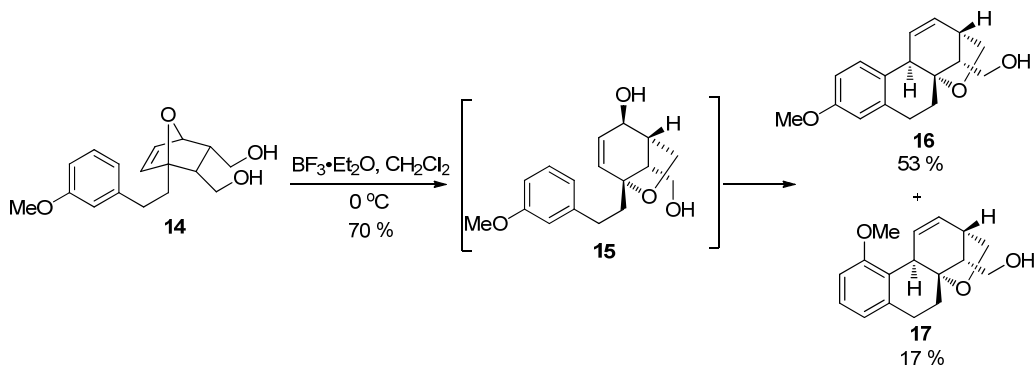

To a solution of compound **14** (2.90 g, 10.00 mmol) in dry CH<sub>2</sub>Cl<sub>2</sub> (20 mL) was added BF<sub>3</sub>•Et<sub>2</sub>O (10.00 mmol, 1.26 mL) at 0 °C under N<sub>2</sub>. TLC indicated that compound **15** was the sole intermediary product at 0.5 h, which was transformed gradually into the cyclization products **16** and **17** entirely after 1 h. The reaction mixture was quenched with 2 mL of H<sub>2</sub>O, extracted with ether, the organic layer was washed successively with water and brine, dried (Na<sub>2</sub>SO<sub>4</sub>), and concentrated in vacuo. The residue was purified by flash column chromatography (PET : EtOAc = 5 : 1) to give **16** (1.430 g, 53%) as a colorless oil and **17** (0.476 g, 17 %) as a colorless oil.

**16**: IR (film):  $\nu_{\max}$  3415, 2931, 2872, 1608, 1500, 1462, 1236, 1042, 958, 851 cm<sup>-1</sup>; <sup>1</sup>H NMR (400 MHz, CDCl<sub>3</sub>):  $\delta$  7.15 (1H, d,  $J$  = 8.4 Hz, ArH), 6.72 (1H, dd,  $J_1$  = 9.6 Hz,  $J_2$  = 2.4 Hz, ArH), 6.63 (1H, d,  $J$  = 2.4 Hz, ArH), 6.20 (1H, m, CH=), 6.07 (1H, dd,  $J_1$  = 9.6 Hz,  $J_2$  = 3.2 Hz, CH=), 4.04 (1H, m, OCH<sub>2</sub>), 3.93, (2H, m, OCH<sub>2</sub>), 3.78 (3H, s, OMe), 3.55 (1H, t,  $J$  = 10.0 Hz, OCH<sub>2</sub>), 3.39 (1H, br s, CH), 2.98–2.81(3H, m), 2.08–1.98(3H, m) ppm; <sup>13</sup>C NMR (100 MHz, CDCl<sub>3</sub>):  $\delta$  157.5, 136.4, 132.8, 130.8, 127.7, 127.6, 113.1, 112.3, 83.3, 74.6, 60.4, 55.2, 49.7, 45.7, 38.1, 29.7, 28.9 ppm; HRMS (ESI)  $m/z$ : calcd for C<sub>17</sub>H<sub>21</sub>O<sub>3</sub> 273.1485, found for [M+H]<sup>+</sup> 273.1488

**17**: IR (film):  $\nu_{\max}$  3420, 2931, 2874, 1579, 1464, 1438, 1249, 1094, 1039, 962, 907, 856 cm<sup>-1</sup>; <sup>1</sup>H NMR (400 MHz, CDCl<sub>3</sub>):  $\delta$  7.08 (1H, t,  $J$  = 8.0 Hz, ArH), 6.70 (2H, m, ArH), 6.50 (1H, dd,  $J_1$  = 9.6 Hz,  $J_2$  = 3.2 Hz, CH=), 6.20 (1H, m, CH=), 4.08 (1H, m, OCH<sub>2</sub>), 3.95 (2H, m, OCH<sub>2</sub>), 3.82 (3H, s, OMe), 3.53 (2H, m, OCH<sub>2</sub>), 3.00 (1H, m, CH), 2.76 (2H, m, CH<sub>2</sub>), 2.05 (1H, m, CH), 1.96 (2H, m, CH<sub>2</sub>) ppm; <sup>13</sup>C NMR (100 MHz, CDCl<sub>3</sub>):  $\delta$  157.8, 137.3, 133.2, 128.1, 126.8, 126.5, 121.2 108.3, 83.7, 75.0, 60.5, 55.0, 49.7, 46.9, 36.8, 29.5, 29.4 ppm; HRMS (ESI)  $m/z$ : calcd for C<sub>17</sub>H<sub>21</sub>O<sub>3</sub> 273.1485, found for [M+H]<sup>+</sup> 273.1481

**15**: IR (film):  $\nu_{\max}$  3367, 2943, 2880, 1603, 1490, 1458, 1260, 1154, 1038, 908, 783, 733, 696 cm<sup>-1</sup>; <sup>1</sup>H NMR (400 MHz, CDCl<sub>3</sub>):  $\delta$  7.22 (1H, t,  $J$  = 7.6 Hz, ArH), 6.80 (1H, d,  $J$  = 7.6 Hz, ArH), 6.75 (2H, m, ArH), 6.03 (1H, d,  $J$  = 9.6 Hz, CH=), 5.87 (1H, dd,  $J_1$  = 9.2 Hz,  $J_2$  = 2.4 Hz, CH=), 4.20 (1H, s, OCH), 4.04 (1H, m, OCH<sub>2</sub>), 3.82 (4H, m, OMe & OCH<sub>2</sub>), 3.56 (1H, m, OCH<sub>2</sub>), 3.38 (1H, d,  $J$  = 9.2 Hz, OCH<sub>2</sub>), 2.66 (3H, m), 2.32 (2H, m), 2.00 (2H, m, CH<sub>2</sub>) ppm; <sup>13</sup>C NMR (100 MHz, CDCl<sub>3</sub>):  $\delta$  159.6, 143.2, 136.2, 129.4, 120.5, 114.0, 111.1, 81.3, 70.5, 66.1, 60.6, 60.4, 55.1, 44.0, 43.6, 34.9, 30.7 ppm; HRMS (ESI)  $m/z$ : calcd for C<sub>17</sub>H<sub>26</sub>O<sub>4</sub>N 308.1856, found for [M+NH<sub>4</sub>]<sup>+</sup> 308.1860

#### 4. Preparation of compound **18**

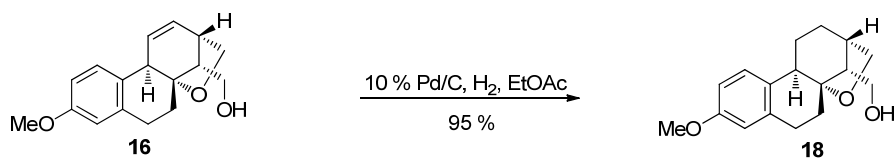

To a solution of **16** (1.36 g, 5.00 mmol) in EtOAc (20 mL) was added 10% Pd/C (136 mg) at room temperature. The reaction flask was evacuated and recharged with H<sub>2</sub> for three times by a H<sub>2</sub> balloon. After 5 h under H<sub>2</sub> atmosphere, the suspension was filtered through Celite and washed with EtOAc. The filtrate was concentrated in vacuo. The residue was purified by flash column chromatography (PET : EtOAc = 2 : 1) to give hydrogenation product **18** (1.30 g, 95%) as colorless solids.  $R_f$  = 0.31 (PET : EtOAc = 1 : 2); mp. 152–153 °C; IR (film):  $\nu_{\max}$  3400, 2928, 2858, 1607, 1492, 1420, 1267, 1247, 1070, 1048, 1026 cm<sup>-1</sup>; <sup>1</sup>H NMR (400 MHz, CDCl<sub>3</sub>):  $\delta$  7.16 (1H, d,  $J$  = 8.4

Hz, ArH), 6.70 (1H, d,  $J = 8.4$  Hz, ArH), 6.65 (1H, s, ArH), 4.00 (1H, m, OCH<sub>2</sub>), 3.91 (1H, d,  $J = 8.0$  Hz, OCH<sub>2</sub>), 3.78 (4H, m, OCH<sub>2</sub> & OMe), 3.43 (1H, m, OCH<sub>2</sub>), 3.00 (2H, m, CH<sub>2</sub>), 2.85 (1H, d,  $J = 6.4$  Hz, CH<sub>2</sub>), 2.48 (1H, s, CH), 2.24 (1H, m, CH<sub>2</sub>), 2.15 (1H, m, CH<sub>2</sub>), 2.06 (1H, m, CH<sub>2</sub>), 1.96 (2H, m, CH<sub>2</sub>), 1.80 (1H, m, CH), 1.60 (1H, m, CH<sub>2</sub>), 1.48 (1H, m, CH<sub>2</sub>) *ppm*; <sup>13</sup>C NMR (100 MHz, CDCl<sub>3</sub>):  $\delta$  157.5, 137.4, 130.7, 125.5, 113.8, 111.4, 84.5, 70.0, 61.0, 55.1, 47.6, 46.0, 37.8, 29.2, 28.7, 27.5, 20.3 *ppm*; HRMS (ESI)  $m/z$ : calcd for C<sub>17</sub>H<sub>26</sub>O<sub>3</sub>N 292.1907, found for [M+NH<sub>4</sub>]<sup>+</sup> 292.1902

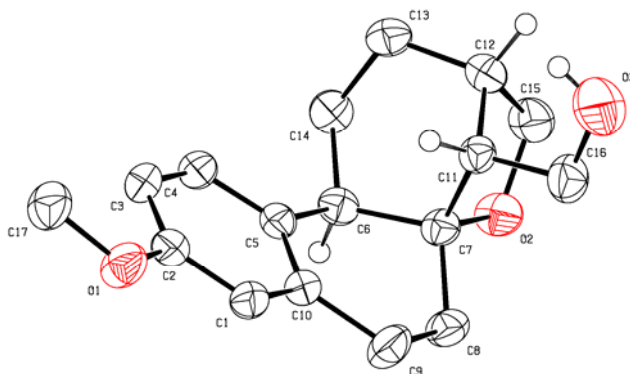

*X-ray crystallographic data of Compound 18*

|                                            |                                                |                 |  |
|--------------------------------------------|------------------------------------------------|-----------------|--|
| Empirical formula                          | C <sub>17</sub> H <sub>22</sub> O <sub>3</sub> |                 |  |
| Formula weight                             | 274.35                                         |                 |  |
| Temperature (K)                            | 294(2)                                         |                 |  |
| Wavelength (Å)                             | 0.71073                                        |                 |  |
| Crystal system                             | Triclinic                                      |                 |  |
| space group                                | P1                                             |                 |  |
| Unit cell dimensions                       | a = 5.4774(11) Å                               | α = 101.285(3)° |  |
|                                            | b = 9.2965(18) Å                               | β = 96.906(3)°  |  |
|                                            | c = 13.809(3) Å                                | γ = 92.077(3)°  |  |
| Volume (Å <sup>3</sup> )                   | 683.3(2)                                       |                 |  |
| Z                                          | 2                                              |                 |  |
| Calculated density (Mg/m <sup>3</sup> )    | 1.333                                          |                 |  |
| Absorption coefficient (mm <sup>-1</sup> ) | 0.090                                          |                 |  |
| Crystal size (mm <sup>3</sup> )            | 0.18 x 0.22 x 0.26                             |                 |  |
| θ range                                    | 1.52 to 26.41°                                 |                 |  |
| Reflections collected / unique             | 3880 / 2753                                    |                 |  |
| R <sub>int</sub>                           | 0.0129                                         |                 |  |
| Data / restraints / parameters             | 2753 / 0 / 183                                 |                 |  |
| Goodness-of-fit on F <sup>2</sup>          | 1.038                                          |                 |  |
| R <sub>1</sub> (I>2σ(I))                   | 0.0499                                         |                 |  |
| WR <sub>2</sub> (all data)                 | 0.1413                                         |                 |  |

## 5. Preparation of compound **19**

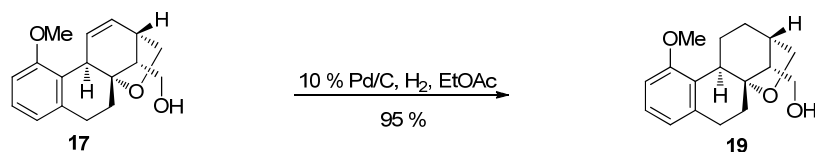

To a solution of **17** (1.36 g, 5.00 mmol) in EtOAc (20 mL) was added 10% Pd/C (136 mg) at room temperature. The reaction flask was evacuated and recharged with H<sub>2</sub> for three times by a H<sub>2</sub> balloon. After 5 h under H<sub>2</sub> atmosphere, the suspension was filtered through Celite and washed with EtOAc. The filtrate was concentrated in vacuo. The residue was purified by flash column chromatography (PET : EtOAc = 2 : 1) to give compound **19** (1.25 g, 95%) as colorless solids. *R<sub>f</sub>* = 0.32 (PET : EtOAc = 1 : 2); mp. 151–152 °C; IR (film):  $\nu_{\text{max}}$  3423, 2922, 2855, 1581, 1481, 1438, 1246, 1065, 1019, 970, 895, 780, 738 cm<sup>-1</sup>; <sup>1</sup>H NMR (400 MHz, CDCl<sub>3</sub>):  $\delta$  7.06 (1H, t, *J* = 8.0 Hz, ArH), 6.70 (2H, d, *J* = 8.4 Hz, ArH), 4.09 (1H, m, OCH<sub>2</sub>), 3.78 (4H, m, OMe & OCH<sub>2</sub>), 3.61 (2H, m, OCH<sub>2</sub>), 3.10 (1H, m, CH), 2.70 (2H, m, CH<sub>2</sub>), 2.50 (1H, t, *J* = 6.4 Hz, CH), 2.23 (2H, m), 2.12 (2H, m), 1.80 (2H, m), 1.60 (1H, m), 1.18 (1H, m) ppm; <sup>13</sup>C NMR (100 MHz, CDCl<sub>3</sub>):  $\delta$  157.4, 138.7, 129.5, 126.0, 120.6, 108.3, 85.2, 73.8, 61.5, 55.1, 45.3, 43.3, 35.1, 30.6, 29.4, 28.8, 22.2 ppm; HRMS (ESI) *m/z*: calcd for C<sub>17</sub>H<sub>23</sub>O<sub>3</sub> 275.1642, found for [M+H]<sup>+</sup> 275.1646

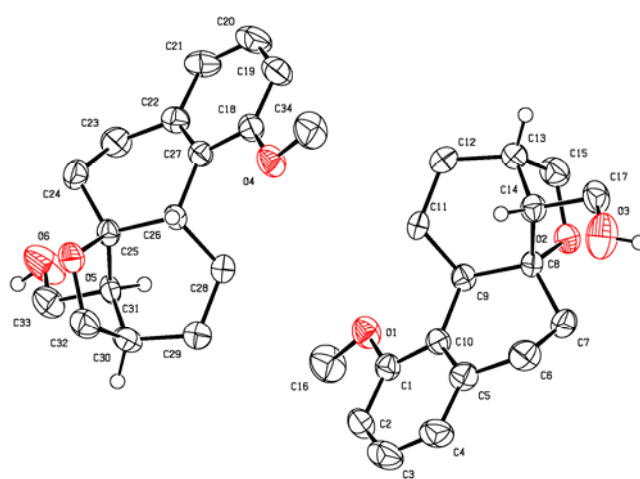

### X-ray crystallographic data of **19**

|                      |                                                |
|----------------------|------------------------------------------------|
| Empirical formula    | C <sub>17</sub> H <sub>22</sub> O <sub>3</sub> |
| Formula weight       | 274.35                                         |
| Temperature (K)      | 294(2)                                         |
| Wavelength (Å)       | 0.71073                                        |
| Crystal system       | Orthorhombic                                   |
| space group          | Pca21                                          |
| Unit cell dimensions | <i>a</i> = 14.159(2) Å $\alpha$ = 90°          |

|                                             |                              |                     |
|---------------------------------------------|------------------------------|---------------------|
|                                             | $b = 6.4481(12) \text{ \AA}$ | $\beta = 90^\circ$  |
|                                             | $c = 30.788(9) \text{ \AA}$  | $\gamma = 90^\circ$ |
| Volume ( $\text{\AA}^3$ )                   | 2810.8(11)                   |                     |
| Z                                           | 8                            |                     |
| Calculated density ( $\text{Mg/m}^3$ )      | 1.297                        |                     |
| Absorption coefficient ( $\text{mm}^{-1}$ ) | 0.087                        |                     |
| Crystal size ( $\text{mm}^3$ )              | 0.16 x 0.32 x 0.38           |                     |
| $\theta$ range                              | 2.65 to $27.18^\circ$        |                     |
| Reflections collected / unique              | 15370 / 3124                 |                     |
| $R_{\text{int}}$                            | 0.0591                       |                     |
| Data / restraints / parameters              | 3124 / 1 / 372               |                     |
| Goodness-of-fit on $F^2$                    | 1.006                        |                     |
| Extinction coefficient                      | 0.0067(8)                    |                     |
| $R_1(I > 2\sigma(I))$                       | 0.0438                       |                     |
| $WR_2$ (all data)                           | 0.1077                       |                     |

## 6. Preparation of compound 20

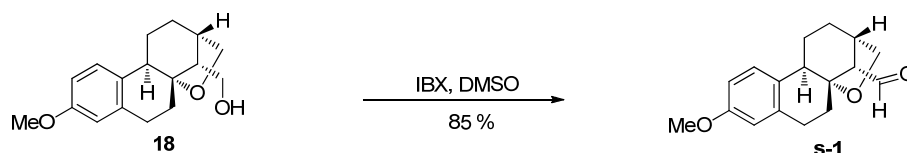

A solution of **18** (1.37 g, 4.15 mmol) in DMSO (10 mL) was treated with IBX (1.1 eq, 1.28 g, 4.60 mmol) at  $30^\circ\text{C}$  and stirred for 30 min, extracted with ether, the organic layer was washed successively with water and brine, dried ( $\text{Na}_2\text{SO}_4$ ), and concentrated in vacuo. The residue was purified by flash column chromatography (PET : EtOAc = 10 : 1) to give compound **s-1** (1.15 g, 85%) as white plates.  $R_f = 0.70$  (PET : EtOAc = 3 : 1); mp.  $113\text{--}115^\circ\text{C}$ ; IR (film):  $\nu_{\text{max}}$  2926, 2856, 1717, 1606, 1493, 1457, 1251, 1504, 1036, 970, 911,  $881\text{ cm}^{-1}$ ;  $^1\text{H}$  NMR (400 MHz,  $\text{CDCl}_3$ ):  $\delta$  9.82 (1H, d,  $J = 3.6\text{ Hz}$ , CHO), 7.17 (1H, d,  $J = 8.8\text{ Hz}$ , ArH), 6.72 (1H, dd,  $J_1 = 8.4\text{ Hz}$ ,  $J_2 = 2.8\text{ Hz}$ , ArH), 6.68 (1H, s, ArH), 4.22–4.20 (1H, m,  $\text{OCH}_2$ ), 4.08 (1H, d,  $J = 8.4\text{ Hz}$ ,  $\text{OCH}_2$ ), 3.78 (3H, s, OMe), 3.0 (2H, m,  $\text{CH}_2$ ), 2.93 (1H, d,  $J = 6.4\text{ Hz}$ ,  $\text{CH}_2$ ), 2.68 (1H, s, CH), 2.43 (1H, d,  $J = 3.6\text{ Hz}$ , CH), 2.44–2.22 (3H, m,  $\text{CH}_2$ ), 2.12 (1H, d,  $J = 8.4\text{ Hz}$ , CH), 1.69–1.63 (1H, m,  $\text{CH}_2$ ), 1.53–1.45 (2H, m,  $\text{CH}_2$ ) ppm;  $^{13}\text{C}$  NMR (100 MHz,  $\text{CDCl}_3$ ):  $\delta$  202.7, 157.9, 136.9, 129.9, 125.7, 113.9, 112.0, 85.5, 71.1, 57.5, 55.1, 45.8, 37.9, 30.2, 28.6, 26.6, 20.2 ppm; HRMS (ESI)  $m/z$ : calcd for  $\text{C}_{17}\text{H}_{24}\text{O}_3\text{N}$  290.1751, found for  $[\text{M}+\text{NH}_4]^+$  290.1757

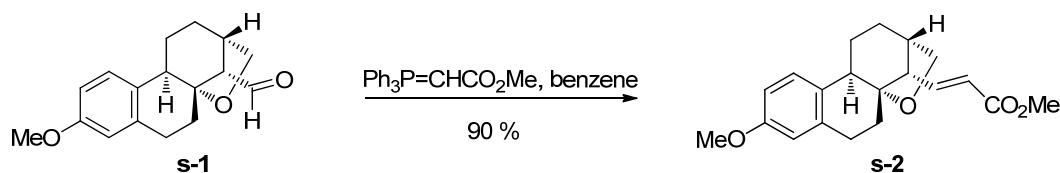

A solution of **s-1** (680 mg, 2.50 mmol) in 15 mL of benzene was added powdered ylide  $\text{Ph}_3\text{P}=\text{CHCO}_2\text{Me}$  (1.67 g, 5.00 mmol). The reaction mixture was heated to  $50^\circ\text{C}$ , stirred for 2 h, cooled to room temperature and extracted with ether. The organic layer was washed successively

with water and brine, dried (Na<sub>2</sub>SO<sub>4</sub>), and concentrated in vacuo. The residue was purified by flash column chromatography (PET : EtOAc = 3 : 1) to give compound **s-2** (738 mg, 90%) as white plates.  $R_f$  = 0.45 (PET : EtOAc = 3 : 1); mp. 127–129 °C; IR (film):  $\nu_{\max}$  2940, 1722, 1652, 1612, 1574, 1498, 1459, 1436, 1321, 1272, 1240, 1171, 1067, 1045, 985, 915, 874, 791, 731, 587 cm<sup>-1</sup>; <sup>1</sup>H NMR (400 MHz, CDCl<sub>3</sub>):  $\delta$  7.18 (1H, d,  $J$  = 8.4 Hz, ArH), 7.00 (1H, dd,  $J_1$  = 15.6 Hz,  $J_2$  = 10.4 Hz, CH=), 6.70 (1H, d,  $J$  = 8.4 Hz, ArH), 6.65 (1H, s, ArH), 5.82 (1H, d,  $J$  = 15.6 Hz, CH=), 4.15 (1H, m, OCH<sub>2</sub>), 4.00 (1H, d,  $J$  = 8.4 Hz, OCH<sub>2</sub>), 3.76 (3H, s, OMe), 3.72 (3H, s, OMe), 2.93–2.81 (3H, m, CH & OCH<sub>2</sub>), 2.39 (1H, d,  $J$  = 10.4 Hz, CH), 2.45–2.15 (3H, m, CH & OCH<sub>2</sub>), 1.97–1.90 (2H, m, CH<sub>2</sub>), 1.63–1.53 (2H, m, CH<sub>2</sub>) ppm; <sup>13</sup>C NMR (100 MHz, CDCl<sub>3</sub>):  $\delta$  166.4, 157.5, 147.0, 137.3, 130.2, 125.5, 122.4, 113.6, 111.5, 84.9, 70.2, 54.9, 51.3, 49.4, 45.0, 42.3, 30.2, 27.9, 26.9, 20.0 ppm; HRMS (ESI)  $m/z$ : calcd for C<sub>20</sub>H<sub>25</sub>O<sub>4</sub> 329.1747, found for [M+H]<sup>+</sup> 329.1750

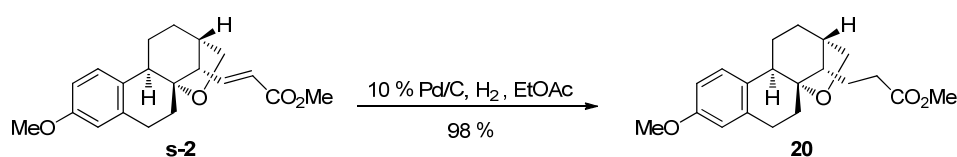

To a solution of **s-2** (1.38 g, 4.20 mmol) in EtOAc (20 mL) was added 10% Pd/C (130 mg) at room temperature. The reaction flask was evacuated and recharged with H<sub>2</sub> for three times by a H<sub>2</sub> balloon. After being stirred for 20 h under H<sub>2</sub> atmosphere, the suspension was filtered through Celite and washed with EtOAc. The filtrate was concentrated in vacuo. The residue was purified by flash column chromatography (PET : EtOAc = 5 : 1) to give compound **20** (1.35 g, 98%) as white plates.  $R_f$  = 0.43 (PET : EtOAc = 3 : 1); mp. 105–106 °C; IR (film):  $\nu_{\max}$  2937, 2877, 1734, 1611, 1497, 1461, 1437, 1367, 1269, 1163, 1070, 1050, 975, 790, 582 cm<sup>-1</sup>; <sup>1</sup>H NMR (100 MHz, CDCl<sub>3</sub>):  $\delta$  7.15 (1H, d,  $J$  = 8.4 Hz, ArH), 6.66 (2H, m, ArH), 4.00 (1H, m, OCH<sub>2</sub>), 3.90 (1H, d,  $J$  = 8.4 Hz, OCH<sub>2</sub>), 3.78 (3H, s, OMe), 3.60 (3H, s, OMe), 2.96 (2H, m, CH<sub>2</sub>), 2.90 (1H, d,  $J$  = 6.0 Hz, CH), 2.34–2.30 (1H, m, CH), 2.24–2.12 (5H, m), 1.97–1.84 (2H, m, CH<sub>2</sub>), 1.61–1.42 (4H, m, CH<sub>2</sub>) ppm; <sup>13</sup>C NMR (100 MHz, CDCl<sub>3</sub>):  $\delta$  173.7, 157.4, 137.5, 130.8, 125.4, 113.7, 113.3, 85.0, 69.7, 54.9, 51.3, 45.9, 44.6, 38.5, 31.7, 29.2, 28.5, 27.8, 22.2, 20.3 ppm; HRMS (ESI)  $m/z$ : calcd for C<sub>20</sub>H<sub>27</sub>O<sub>4</sub> 331.1904, found for [M+H]<sup>+</sup> 331.1903

## 7. Preparation of compound **21**

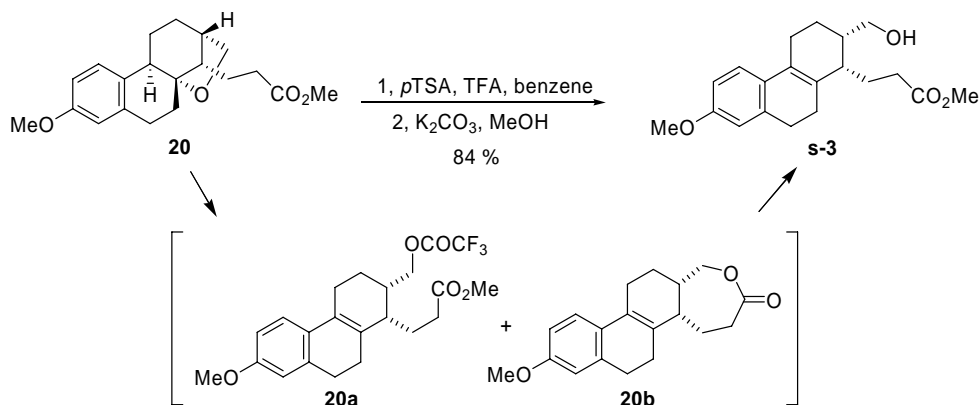



A solution of **20** (330 mg, 1.00 mmol) in 10 mL of benzene was treated with 0.5 mL TFA and *p*-toluenesulfoic acid (60 mg, 0.20 mmol). The reaction mixture was heated to 50 °C, stirred for 1 h, cooled to room temperature and the reaction mixture was quenched by 2 mL of saturated aqueous NaHCO<sub>3</sub>, extracted with ether, the organic layer was washed successively with water and brine, dried (Na<sub>2</sub>SO<sub>4</sub>), concentrated in vacuo to give the crude acidolysis product mixture which was used directly in the following step without further purification. The crude product mixture was dissolved in absolute MeOH (5 mL), to which K<sub>2</sub>CO<sub>3</sub> (207 mg, 1.50 mmol) was added at room temperature and stirred for 10 min. The reaction mixture was extracted with ether, the organic layer was washed successively with water and brine, dried (Na<sub>2</sub>SO<sub>4</sub>), and concentrated in vacuo. The residue was purified by flash column chromatography (PET : EtOAc = 5 : 1) to give compound **s-3** (280 mg, 84%) as a colorless oil. *R*<sub>f</sub> = 0.15 (PET : EtOAc = 3 : 1); IR (film):  $\nu_{\max}$  3438, 2927, 2875, 1734, 1608, 1499, 1252, 1161, 1038, 808 cm<sup>-1</sup>; <sup>1</sup>H NMR (400 MHz, CDCl<sub>3</sub>):  $\delta$  7.10 (1H, d, *J* = 8.0 Hz, ArH), 6.68 (2H, m, ArH), 3.78 (3H, s, OMe), 3.67 (3H, s, OMe), 3.65–3.59 (2H, m, OCH<sub>2</sub>), 2.71 (2H, t, *J* = 7.6 Hz, CH<sub>2</sub>), 2.26–2.25 (7H, m), 2.19–2.13 (1H, m), 1.99–1.85 (2H, m), 1.72–1.65 (2H, m), 1.54–1.48 (1H, m) ppm; <sup>13</sup>C NMR (100 MHz, CDCl<sub>3</sub>)  $\delta$  174.5, 157.8, 137.3, 134.8, 129.0, 126.5, 122.9, 113.2, 110.7, 64.5, 55.1, 51.5, 40.3, 39.3, 33.4, 29.0, 28.9, 25.1, 24.6, 21.0 ppm; HRMS (ESI) *m/z*: calcd for C<sub>20</sub>H<sub>27</sub>O<sub>4</sub> 331.1904, found for [M+H]<sup>+</sup> 331.1906

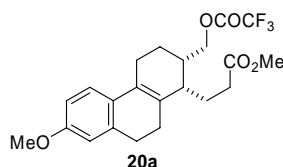

Intermediate **20a**: *R*<sub>f</sub> = 0.80 (PET : AcOEt = 3 : 1); IR (film):  $\nu_{\max}$  2935, 2837, 1785, 1738, 1608, 1500, 1436, 1353, 1253, 1223, 1163, 1041, 853, 808, 776, 732, 611, 522 cm<sup>-1</sup>; <sup>1</sup>H NMR (400 MHz, CDCl<sub>3</sub>):  $\delta$  7.12 (1H, d, *J* = 8.4 Hz), 6.70 (2H, m), 4.37 (2H, m), 3.79 (3H, s), 3.68 (3H, s), 2.71 (2H, t, *J* = 7.6 Hz), 2.16–2.53 (8H, m), 1.83 (3H, m), 1.65 (1H, m) ppm; <sup>13</sup>C NMR (100 MHz, CDCl<sub>3</sub>):  $\delta$  173.6, 158.1, 157.7, 157.2, 137.4, 133.4, 128.7, 126.9, 123.1, 113.3, 110.9, 69.7, 55.2, 51.6, 39.5, 36.5, 29.0, 28.5, 24.7, 24.6, 21.1 ppm; EIMS *m/z* (%): 426 (M<sup>+</sup>, 33), 225 (100), 165 (38), 105 (42), 69 (76).

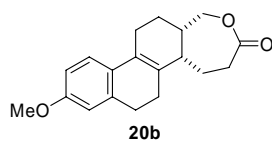

Intermediate **20b**: *R*<sub>f</sub> = 0.20 (PET : AcOEt = 3 : 1); mp. 164–166 °C; IR (film):  $\nu_{\max}$  2931, 2835, 2250, 1731, 1608, 1571, 1499, 1435, 1395, 1330, 1303, 1279, 1252, 1167, 1070, 1039, 912, 809, 732 cm<sup>-1</sup>; <sup>1</sup>H NMR (400 MHz, CDCl<sub>3</sub>):  $\delta$  7.12 (1H, d, *J* = 8.4 Hz), 6.70 (2H, m), 4.39 (1H, d, *J* = 12.8 Hz), 4.21 (1H, dd, *J*<sub>1</sub> = 8.8 Hz, *J*<sub>2</sub> = 5.2 Hz), 3.78 (3H, s), 2.68 (4H, m), 2.50 (2H, m), 2.30 (2H, m), 1.80 (3H, m), 1.65 (3H, m) ppm; <sup>13</sup>C NMR (100 MHz, CDCl<sub>3</sub>):  $\delta$  175.5, 158.1, 137.2, 133.3, 128.5, 126.8, 123.1, 113.3, 110.8, 71.2, 55.1, 43.9, 37.2, 32.6, 28.9, 27.5, 25.5, 2.38, 20.4 ppm; EIMS *m/z* (%): 298 (M<sup>+</sup>, 100), 225 (74), 211 (43), 115 (32).

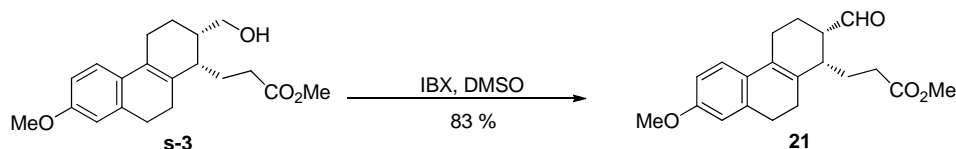

A solution of **s-3** (700 mg, 2.12 mmol) in DMSO (10 mL) was treated with IBX (650 mg, 2.33 mmol) at 30 °C and stirred for 30 min, extracted with ether, the organic layer was washed successively with water and brine, dried (Na<sub>2</sub>SO<sub>4</sub>), and concentrated in vacuo. The residue was purified by flash column chromatography (PET : EtOAc = 10 : 1) to give compound **21** (580 mg, 83%) as white plates. *R<sub>f</sub>* = 0.60 (PET : EtOAc = 2 : 1); mp. 104–105 °C; IR (film):  $\nu_{\text{max}}$  2926, 2831, 1733, 1713, 1606, 1497, 1433, 1245, 1198, 1154, 1039, 980, 803 cm<sup>-1</sup>; <sup>1</sup>H NMR (400 MHz, CDCl<sub>3</sub>):  $\delta$  9.86 (1H, s, CHO), 7.11 (1H, d, *J* = 8.4 Hz, ArH), 6.69 (2H, m, ArH), 3.78 (3H, s, OMe), 3.66 (3H, s, OMe), 2.73 (2H, t, *J* = 8.0 Hz), 2.67–2.62 (2H, m), 2.56–2.52 (1H, m), 2.44–2.30 (4H, m), 2.30–2.09 (2H, m), 1.90–1.83 (3H, m) ppm; <sup>13</sup>C NMR (100 MHz, CDCl<sub>3</sub>):  $\delta$  204.1, 173.2, 158.0, 137.1, 132.9, 128.4, 127.0, 122.9, 113.1, 110.7, 54.9, 51.4, 51.0, 38.6, 32.9, 28.7, 28.2, 26.1, 24.2, 18.1 ppm; HRMS (ESI) *m/z*: calcd for C<sub>20</sub>H<sub>24</sub>O<sub>4</sub>Na 351.1567, found for [M+Na]<sup>+</sup> 351.1571

#### 8. Preparation of compound 22

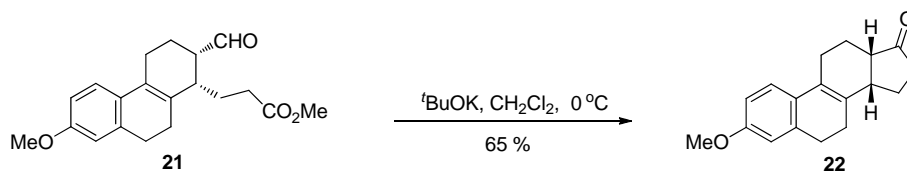

To a suspension of solid <sup>t</sup>BuOK (103 mg, 0.92 mmol) in 5 mL of dry CH<sub>2</sub>Cl<sub>2</sub> at 0 °C was added a solution of compound **21** (75 mg, 0.23 mmol) in dry CH<sub>2</sub>Cl<sub>2</sub> (1 mL) under N<sub>2</sub>. After being stirred for only 1 min at 0 °C, the reaction was quenched by 0.5 mL of saturated aqueous NH<sub>4</sub>Cl, extracted with ether. The organic layer was washed successively with water and brine, dried (Na<sub>2</sub>SO<sub>4</sub>), and concentrated in vacuo. The residue was purified by flash column chromatography (PET : EtOAc = 15 : 1) to give tetracyclic ketone **22** (36 mg, 65%)<sup>1</sup> as a colorless solid. *R<sub>f</sub>* = 0.44 (PET : EtOAc = 5 : 1); mp. 129–130 °C; IR (film):  $\nu_{\text{max}}$  2927, 2881, 1736, 1607, 1498, 1430, 1251, 1143, 1041, 812 cm<sup>-1</sup>; <sup>1</sup>H NMR (400 MHz, CDCl<sub>3</sub>):  $\delta$  7.08 (1H, d, *J* = 8.0 Hz, ArH), 6.69 (2H, m, ArH), 3.79 (3H, s, OMe), 2.97 (1H, s, CH), 2.81–2.69 (2H, m, CH<sub>2</sub>), 2.47–2.10 (8H, m, CH & CH<sub>2</sub>), 2.02–1.92 (2H, m, CH<sub>2</sub>), 1.86–1.80 (1H, m, CH<sub>2</sub>) ppm; <sup>13</sup>C NMR (100 MHz, CDCl<sub>3</sub>):  $\delta$  221.4, 158.1, 137.0, 131.3, 129.1, 128.3, 123.1, 113.3, 110.8, 55.2, 47.4, 41.0, 36.9, 28.7, 26.9, 26.0, 23.1, 20.7 ppm; HRMS (ESI) *m/z*: calcd for C<sub>18</sub>H<sub>21</sub>O<sub>2</sub> 269.1536, found for [M+H]<sup>+</sup> 269.1543

#### 9. Preparation of compound 23

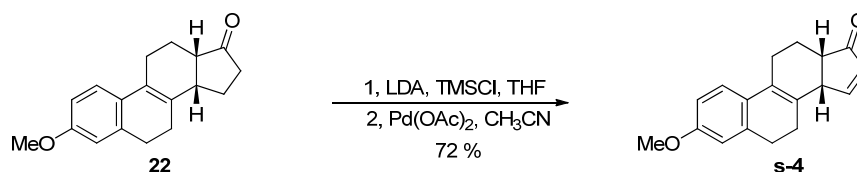

<sup>1</sup> The *cis* stereochemistry of tetracyclic ketone product **22** was deduced according to: (a) House, H. O.; Rasmusson, G. H. *J. Org. Chem.* **1963**, 28, 31; (b) Snider, B. B.; Marin, C. P. C. *J. Org. Chem.* **1984**, 49, 1688.

To a stirred solution of diisopropylamine (0.07 mL) in dry THF (1 mL) was added *n*-BuLi (1.6 M in hexane, 0.25 mL) dropwise at 0 °C under N<sub>2</sub>, and the mixture was stirred for 30 min. The resulting LDA solution was cooled to –78 °C, and then a solution of **22** (35 mg, 0.13 mmol) in dry THF (1 mL) was added dropwise via a syringe, stirred for 10 min. A solution of TMSCl (0.07 mL) in THF (1 mL) was added, stirred for 10 min and monitored by TLC. The solvent was evaporated and the resulting suspension was filtered through alumina (1.00 g, PET : EtOAc = 4 : 1). After removing the solvent, the remaining crude silyl ether was taken in dry acetonitrile (1 mL), Pd(OAc)<sub>2</sub> (30 mg) was added.<sup>2</sup> The resulting mixture was stirred for 2 h at room temperature and filtered through Celite. The filtrate was concentrated in vacuo. The crude residue was purified by flash column chromatography (PET : EtOAc = 10 : 1) to give dehydrogenated product **s-4** (25 mg, 72%). *R*<sub>f</sub> = 0.30 (PET : EtOAc = 5 : 1); mp. 111–112 °C; IR (film):  $\nu_{\max}$  2929, 2833, 1705, 1606, 1498, 1251, 1160, 1040, 855, 808 cm<sup>-1</sup>; <sup>1</sup>H NMR (400 MHz, CDCl<sub>3</sub>):  $\delta$  7.71 (1H, dd, *J*<sub>1</sub> = 5.6 Hz, *J*<sub>2</sub> = 2.8 Hz, CH=), 7.06 (1H, d, *J* = 8.0 Hz, ArH), 6.70 (2H, m, ArH), 6.16 (1H, dd, *J*<sub>1</sub> = 5.6 Hz, *J*<sub>2</sub> = 2.0 Hz, CH=), 3.79 (3H, s, OMe), 3.62 (1H, br s, CH), 2.89–2.67 (3H, m, CH & CH<sub>2</sub>), 2.46–2.35 (2H, m, CH<sub>2</sub>), 2.36–2.24 (1H, m, CH<sub>2</sub>), 2.18–2.06 (2H, m, CH<sub>2</sub>), 1.93–1.86 (1H, m, CH<sub>2</sub>) ppm; <sup>13</sup>C NMR (100 MHz, CDCl<sub>3</sub>):  $\delta$  212.1, 164.3, 158.2, 136.6, 132.2, 129.9, 128.8, 128.3, 123.4, 113.5, 110.9, 55.3, 47.3, 44.9, 28.6, 27.5, 23.9, 22.4 ppm; HRMS (ESI) *m/z*: calcd for C<sub>18</sub>H<sub>19</sub>O<sub>2</sub> 267.1380, found for [M+H]<sup>+</sup> 267.1385

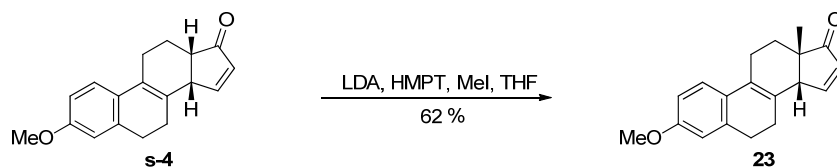

To a stirred solution of diisopropylamine (0.26 mL) in dry THF (1 mL) was added *n*-BuLi (1.6 M in hexane, 0.90 mL) dropwise at 0 °C under N<sub>2</sub>, and the mixture was stirred for 10 min. The resulting LDA solution was cooled to –78 °C, and then a solution of **s-4** (20 mg, 0.075 mmol) and HMPT (0.2 mL) in dry THF (1 mL) was added dropwise via syringe, stirred for 30 min. MeI (0.2 mL, excess) was added. The reaction was allowed to warm to room temperature slowly, stirred for 2 h and monitored by TLC.<sup>3</sup> The reaction was quenched by 0.5 mL of saturated aqueous NH<sub>4</sub>Cl, extracted with ether, the organic layer was washed successively with water and brine, dried (Na<sub>2</sub>SO<sub>4</sub>), and concentrated in vacuo. The residue was purified by flash column chromatography to give compound **23** (13 mg, 62%).<sup>4</sup> *R*<sub>f</sub> = 0.32 (PET : EtOAc = 5 : 1); mp. 113–114 °C; IR (film):  $\nu_{\max}$  2923, 2851, 1707, 1607, 1499, 1250, 1158, 1039, 812 cm<sup>-1</sup>; <sup>1</sup>H NMR (400 MHz, CDCl<sub>3</sub>):  $\delta$  7.63 (1H, d, *J* = 8.0 Hz, CH=), 7.08 (1H, d, *J* = 8.0 Hz, ArH), 6.71 (2H, m, ArH), 6.11 (1H, dd, *J*<sub>1</sub> = 5.6, *J*<sub>2</sub> = 2.8 Hz, CH=), 3.80 (3H, s, OMe), 3.15 (1H, s, CH), 2.85–2.75 (2H, m, CH<sub>2</sub>), 2.45–2.39 (2H, m, CH<sub>2</sub>), 2.32–2.12 (2H, m, CH<sub>2</sub>), 1.94–1.89 (1H, m, CH<sub>2</sub>), 1.62–1.58 (1H, m, CH<sub>2</sub>), 1.20 (3H, s, Me) ppm; <sup>13</sup>C NMR (100 MHz, CDCl<sub>3</sub>):  $\delta$  214.5, 162.6, 158.3, 136.7, 130.6, 129.6, 128.6, 128.4, 123.4, 113.6, 111.0, 55.5, 46.9, 31.5, 29.7, 28.7, 27.5, 22.5, 22.3 ppm; HRMS (ESI) *m/z*: calcd for C<sub>19</sub>H<sub>21</sub>O<sub>2</sub> 281.1536, found for [M+H]<sup>+</sup> 281.1536

<sup>2</sup> For similar experimental procedures of ketone dehydrogenation via the corresponding enolsilane, see: (a) Singh, V.; Vedantham, P.; Sahu, P. K. *Tetrahedron Lett.* **2002**, 43, 519; (b) Singh, V.; Vedantham, P.; Sahu, P. K. *Tetrahedron* **2004**, 60, 8161. (c) Asano, M.; Inoue, M.; Katoh, T. *Synlett* **2005**, 2599.

<sup>3</sup> For similar experimental procedures, see: (a) Paquette, L. A.; Geng, F. *J. Am. Chem. Soc.* **2002**, 124, 9199; (b) Geng, F.; Liu, J.; Paquette, L. A. *Org. Lett.* **2002**, 4, 71.

<sup>4</sup> All spectroscopic data (IR, <sup>1</sup>H NMR and <sup>13</sup>C NMR) of synthetic compound **23** are consistent with those of reported in a recent literature: Weimar, M.; Dürner, G.; Bats, J. W.; Göbel, M. W. *J. Org. Chem.* **2010**, 75, 2718.

## 10. Preparation of Torgov diene **24**<sup>5</sup>

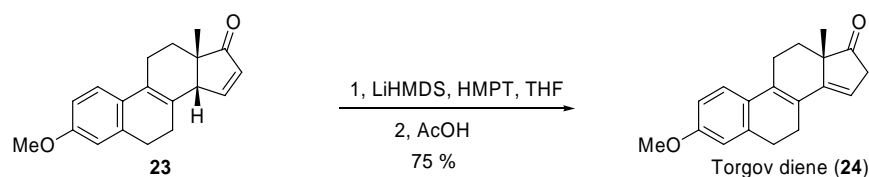

To a stirred solution of HMDS (10 eq, 0.05 mL) and HMPT (0.5 mL) in dry THF (1 mL) was added *n*-BuLi (1.6M in hexane, 0.17 mL) dropwise at  $-78\text{ }^{\circ}\text{C}$  under  $\text{N}_2$ , and the mixture was stirred for 15 min. A solution of compound **23** (8 mg, 0.03 mmol) in dry THF (1 mL) was added dropwise via a syringe. After stirring for 20 min. at  $-78\text{ }^{\circ}\text{C}$ , the reaction mixture was treated with glacial acetic acid (0.5 mL) and warmed to room temperature gradually. The mixture was poured into a solution of aqueous HCl (1 M, 5 mL), extracted with ether, the organic layer was washed successively with water and brine, dried ( $\text{Na}_2\text{SO}_4$ ), and concentrated in vacuo. The residue was purified by flash column chromatography (PET : EtOAc = 15 : 1) to give compound **24** (6 mg, 75%)<sup>6</sup> as colorless solids.  $R_f$  = 0.48 (PET : EtOAc = 5 : 1); mp.  $106\text{--}107\text{ }^{\circ}\text{C}$ ; [Lit.<sup>5b</sup> mp.  $115\text{--}116\text{ }^{\circ}\text{C}$  (MeOH); Lit.<sup>5c</sup> mp.  $108\text{--}109\text{ }^{\circ}\text{C}$  (MeOH)]; IR (film):  $\nu_{\text{max}}$  2922, 2852, 1744, 1601, 1461, 1248, 1160, 1041,  $800\text{ cm}^{-1}$ ;  $^1\text{H}$  NMR (400 MHz,  $\text{CDCl}_3$ ):  $\delta$  7.25 (1H, s, ArH), 6.73 (2H, m, ArH), 5.87 (1H, s, CH=), 3.82 (3H, s, OMe), 3.33 (1H, dd,  $J_1 = 23.2\text{ Hz}$ ,  $J_2 = 2.8\text{ Hz}$ ,  $\text{CH}_2$ ), 2.93 (1H, dd,  $J_1 = 23.2\text{ Hz}$ ,  $J_2 = 2.8\text{ Hz}$ ,  $\text{CH}_2$ ), 2.81 (2H, m,  $\text{CH}_2$ ), 2.66–2.59 (3H, m,  $\text{CH}_2$ ), 2.33–2.29 (1H, m,  $\text{CH}_2$ ), 2.07–2.02 (1H, m,  $\text{CH}_2$ ), 1.63–1.59 (1H, m,  $\text{CH}_2$ ), 1.14 (3H, s, Me) ppm;  $^{13}\text{C}$  NMR (100 MHz,  $\text{CDCl}_3$ ):  $\delta$  220.1, 158.7, 146.9, 138.2, 129.9, 128.6, 125.3, 124.1, 114.7, 113.6, 111.1, 55.3, 49.1, 42.0, 29.7, 28.4, 27.3, 23.0, 20.6 ppm; HRMS (ESI)  $m/z$ : calcd for  $\text{C}_{19}\text{H}_{21}\text{O}_2$  281.1536, found for  $[\text{M}+\text{H}]^+$  281.1543

## 11. Preparation of compound **26**

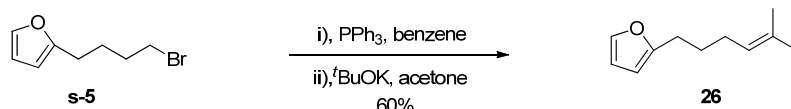

A mixture of furano bromide **s-5** (2.03 g, 10.00 mmol)<sup>7</sup> and triphenylphosphine (2.62 g, 10.00 mmol) in 20 mL of benzene was refluxed for 1 day. After cooling to room temperature and filtration, the solids were collected and air-dried to give 2.6 g of white solids, which was suspended in 10 mL of THF and treated with  $^t\text{BuOK}$  (1.68 g, 15.00 mmol) at  $0\text{ }^{\circ}\text{C}$ . The resulting mixture was stirred for 30 min, to which dry acetone (560 mg, 10.00 mmol) was added at  $0\text{ }^{\circ}\text{C}$ . After stirring for 4 h at room temperature, the reaction mixture was quenched with 5 mL water, extracted with ether, the organic layer was washed successively with water and brine, dried ( $\text{Na}_2\text{SO}_4$ ), and concentrated in vacuo. The residue was purified by flash column chromatography (PET) to give compound **26** (492 mg, 80 %) as a colorless oil.  $R_f$  = 0.80 (PET);  $^1\text{H}$  NMR (400 MHz,  $\text{CDCl}_3$ ):  $\delta$  7.28 (1H, m, Furan-H), 6.26 (1H, m, Furan-H), 5.96 (1H, m, Furan-H), 5.13 (1H, t,  $J = 7.2\text{ Hz}$ , CH=), 2.61 (2H, t,  $J = 7.6\text{ Hz}$ ,  $\text{CH}_2$ ), 2.03 (2H, q,  $J = 7.2\text{ Hz}$ ,  $\text{CH}_2$ ), 1.69 (5H, m, Me &  $\text{CH}_2$ ), 1.59 (3H, s, Me) ppm;  $^{13}\text{C}$  NMR (100 MHz,  $\text{CDCl}_3$ ):  $\delta$  156.4, 140.6, 132.0, 124.0, 110.0, 104.6, 28.1, 27.5, 27.4, 25.7, 17.7 ppm

<sup>5</sup> (a) Hu, Q.-Y.; Rege, P. D.; Corey, E. J. *J. Am. Chem. Soc.* **2004**, *126*, 5984; (b) Quinkert, G.; Grosso, M. D.; Döring, A. Döring, W.; Schenkel, R.; Bauch, M.; Dambacher, G. T.; Bats, J. W.; Zimmermann, G.; Dürner, G. *Helv. Chim. Acta.* **1995**, *78*, 1345; (c) Ananchenko, S. N.; Torgov, I. V. *Tetrahedron Lett.* **1963**, *3*, 1553.

<sup>6</sup> All spectroscopic data (IR,  $^1\text{H}$  NMR and  $^{13}\text{C}$  NMR) of synthetic compound **24** are consistent with those of reported in the literatures.<sup>5</sup>

<sup>7</sup> Prepared according to: Christneio, G.; Briana, K. *Can. J. Chem.* **1992**, *70*, 2929.

## 12. The Diels–Alder cycloaddition of furan **26** with dimethyl maleate

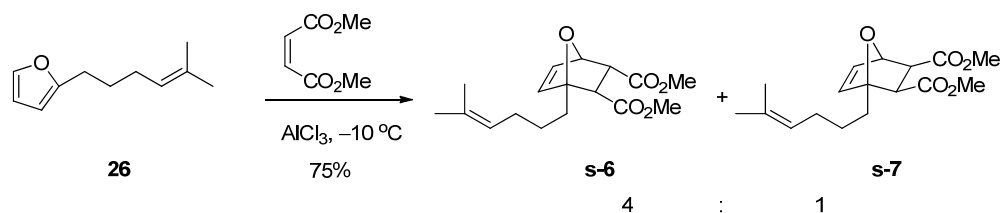

Dimethyl maleate (792 mg, 5.50 mmol) was introduced into a flask containing powdered  $\text{AlCl}_3$  (133.5 mg, 1.00 mmol) at  $-10\text{ }^\circ\text{C}$  under  $\text{N}_2$ . The resulting mixture was stirred for 10 min., and compound **26** (802 mg, 5 mmol) was added via a syringe. The reaction mixture was stirred at  $-10\text{ }^\circ\text{C}$  for 2 days, extracted with ether, the organic layer was washed successively with water and brine, dried ( $\text{Na}_2\text{SO}_4$ ), and concentrated in vacuo. The residue was purified by flash column chromatography (PET : EtOAc = 5 : 1) to give the endo-adduct **s-6** (951 mg, 60%) as a colorless oil and the exo-isomer **s-7** (230 mg, 15%) as white plates.

**s-6**:  $R_f$  = 0.50 (PET : EtOAc = 2 : 1); IR (film):  $\nu_{\text{max}}$  3467, 2950, 2859, 1744, 1438, 1202, 1164, 1060, 1011, 930, 714, 496  $\text{cm}^{-1}$ ;  $^1\text{H}$  NMR (400 MHz,  $\text{CDCl}_3$ ):  $\delta$  6.47 (1H, d,  $J$  = 5.6 Hz, CH=), 6.40 (1H, d,  $J$  = 5.6 Hz, CH=), 5.11 (1H, t,  $J$  = 7.2 Hz, CH=), 5.05 (1H, dd,  $J_1$  = 4.8,  $J_2$  = 1.6 Hz, OCH), 3.64 (3H, s, OMe), 3.61 (3H, s, OMe), 3.55 (1H, dd,  $J_1$  = 10.0,  $J_2$  = 4.4 Hz, CH), 3.09 (1H, d,  $J$  = 10.4 Hz, CH), 2.09 (3H, m,  $\text{CH}_2$ ), 1.85 (1H, m,  $\text{CH}_2$ ), 1.68 (3H, s, Me), 1.60 (3H, s, Me), 1.45 (2H, m,  $\text{CH}_2$ ) ppm;  $^{13}\text{C}$  NMR (100 MHz,  $\text{CDCl}_3$ ):  $\delta$  171.0, 170.5, 137.1, 134.7, 131.6, 123.9, 91.6, 79.2, 51.5, 51.2, 50.5, 31.1, 28.0, 25.5, 24.8, 17.5 ppm; HRMS (ESI)  $m/z$ : calcd for  $\text{C}_{17}\text{H}_{32}\text{NO}_5\text{N}$  326.1962, found for  $[\text{M}+\text{NH}_4]^+$  326.1957

**s-7**:  $R_f$  = 0.25 (PET : EtOAc = 2 : 1); mp. 83–84  $^\circ\text{C}$ ; IR (film):  $\nu_{\text{max}}$  3446, 2951, 2868, 1748, 1437, 1357, 1215, 1162, 1047, 930, 843, 731, 517, 424  $\text{cm}^{-1}$ ;  $^1\text{H}$  NMR (400 MHz,  $\text{CDCl}_3$ ):  $\delta$  6.45 (1H, m, CH=), 6.28 (1H, d,  $J$  = 6.0 Hz, CH=), 5.40 (1H, d,  $J$  = 1.6 Hz, OCH), 5.09 (1H, t,  $J$  = 7.2 Hz, CH=), 3.70 (3H, s, OMe), 3.68 (3H, s, OMe), 2.93 (1H, d,  $J$  = 8.8 Hz, CH), 2.81 (1H, d,  $J$  = 8.8 Hz, CH), 2.00 (2H, m,  $\text{CH}_2$ ), 1.83 (3H, m,  $\text{CH}_2$ ), 1.67 (3H, s, Me), 1.58 (3H, s, Me), 1.45 (1H, m,  $\text{CH}_2$ ) ppm;  $^{13}\text{C}$  NMR (100 MHz,  $\text{CDCl}_3$ ):  $\delta$  171.8, 171.6, 138.2, 137.2, 132.0, 123.8, 91.6, 79.0, 52.1, 51.8, 50.1, 49.9, 29.2, 28.1, 25.6, 25.3, 17.6 ppm; HRMS (ESI)  $m/z$ : calcd for  $\text{C}_{17}\text{H}_{32}\text{NO}_5\text{N}$  326.1962, found for  $[\text{M}+\text{NH}_4]^+$  326.1959

## 13. Preparation of compound **25**

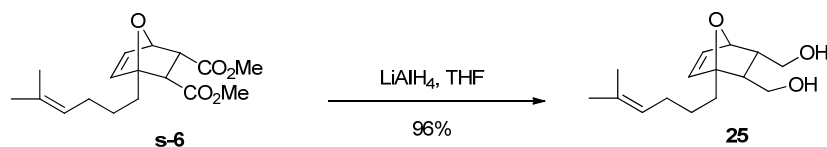

To a suspension of powdered  $\text{LiAlH}_4$  (76 mg, 2.00 mmol) in 10 mL of dry THF at  $0\text{ }^\circ\text{C}$  was added a solution of compound **s-6** (616 mg, 2.00 mmol) in dry THF (5 mL) under  $\text{N}_2$ . After being stirred for 10 min at  $0\text{ }^\circ\text{C}$ , the reaction mixture was quenched with 5 mL of water, extracted with ether, the organic layer was washed successively with water and brine, dried ( $\text{Na}_2\text{SO}_4$ ), and concentrated in vacuo. The residue was purified by flash column chromatography (PET : EtOAc =

1 : 2) to give compound **25** (490 mg, 96%) as a colorless oil.  $R_f = 0.20$  (PET : EtOAc = 1 : 2); IR (film):  $\nu_{\max}$  3374, 2923, 2856, 1442, 1380, 1037, 935, 725, 468  $\text{cm}^{-1}$ ;  $^1\text{H}$  NMR (400 MHz,  $\text{CDCl}_3$ ):  $\delta$  6.26 (1H, d,  $J = 5.2$  Hz, CH=), 6.11 (1H, d,  $J = 6.0$  Hz, CH=), 5.11 (1H, t,  $J = 7.2$  Hz, CH=), 4.77 (1H, dd,  $J_1 = 4.4$ ,  $J_2 = 1.6$  Hz, OCH), 4.02 (2H, s, br., OH), 3.60 (2H, dd,  $J_1 = 10.8$ ,  $J_2 = 3.2$  Hz,  $\text{OCH}_2$ ), 3.25 (2H, m,  $\text{OCH}_2$ ), 2.77 (1H, m, CH), 2.36 (1H, m, CH), 2.04 (2H, m,  $\text{CH}_2$ ), 1.97 (1H, m,  $\text{CH}_2$ ), 1.81 (1H, m,  $\text{CH}_2$ ), 1.69 (3H, s, Me), 1.60 (3H, s, Me), 1.56–1.42 (2H, m,  $\text{CH}_2$ )  $\text{ppm}$ ;  $^{13}\text{C}$  NMR (100 MHz,  $\text{CDCl}_3$ ):  $\delta$  137.0, 134.9, 131.8, 124.1, 90.9, 79.1, 61.0, 60.7, 48.5, 46.9, 31.4, 28.2, 25.7, 24.9, 17.7  $\text{ppm}$ ; HRMS (ESI)  $m/z$ : calcd for  $\text{C}_{15}\text{H}_{28}\text{NO}_3$  270.2064, found for  $[\text{M}+\text{NH}_4]^+$  270.2059

#### 14. Cyclization of compound **25**

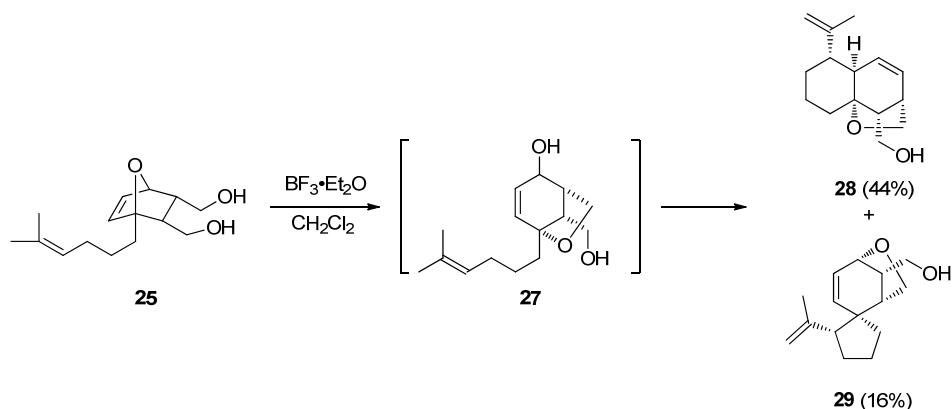

To a solution of compound **25** (180 mg, 0.71 mmol) in dry  $\text{CH}_2\text{Cl}_2$  (4 mL) was added  $\text{BF}_3 \cdot \text{Et}_2\text{O}$  (0.09 mL, 0.70 mmol) at 0 °C under  $\text{N}_2$ . TLC indicated that the intermediary product **27** was formed after 10 min., which was transformed into the eventual cyclization products **28** and **29** after 30 min. The reaction mixture was quenched with 1 mL of  $\text{H}_2\text{O}$ , extracted with ether, the organic layer was washed successively with water and brine, dried ( $\text{Na}_2\text{SO}_4$ ), and concentrated in vacuo. The residue was purified by flash column chromatography (PET : EtOAc = 5 : 1) to give **28** (72 mg, 44%) as a colorless oil and **29** (26 mg, 16%) as a colorless oil.

**27**:  $R_f = 0.15$  (PET : EtOAc = 1 : 2); IR (film):  $\nu_{\max}$  3351, 2927, 2874, 1741, 1531, 1032, 914, 841, 763, 713, 666, 615, 526  $\text{cm}^{-1}$ ;  $^1\text{H}$  NMR (400 MHz,  $\text{CDCl}_3$ ):  $\delta$  5.88 (1H, d,  $J = 9.2$  Hz, CH=), 5.78 (1H, s, br., CH=), 5.08 (1H, s, br., CH=), 4.13 (1H, s, br., OH), 4.00 (1H, m, br., OCH), 3.78 (3H, s, br.,  $\text{OCH}_2$  & OH), 3.34 (2H, m,  $\text{OCH}_2$ ), 2.72 (1H, s, br., CH), 2.26 (1H, s, br., CH), 2.02 (2H, d,  $J = 6.8$  Hz,  $\text{CH}_2$ ), 1.69 (3H, s, Me), 1.57 (5H, m, Me &  $\text{CH}_2$ ), 1.35 (2H, m,  $\text{CH}_2$ )  $\text{ppm}$ ;  $^{13}\text{C}$  NMR (100 MHz,  $\text{CDCl}_3$ ):  $\delta$  136.8, 132.2, 129.0, 123.8, 81.5, 70.5, 66.1, 60.3, 43.8, 43.3, 32.8, 28.3, 25.6, 24.7, 17.7  $\text{ppm}$ ; HRMS (ESI)  $m/z$ : calcd for  $\text{C}_{15}\text{H}_{24}\text{O}_3\text{Na}$  275.1618, found for  $[\text{M}+\text{Na}]^+$  275.1612

**28**:  $R_f = 0.58$  (PET : EtOAc = 1 : 2); IR (film):  $\nu_{\max}$  3405, 2930, 2863, 1644, 1448, 1380, 1054, 1027, 960, 889, 852, 726, 571  $\text{cm}^{-1}$ ;  $^1\text{H}$  NMR (400 MHz,  $\text{CDCl}_3$ ):  $\delta$  6.05 (1H, m, CH=), 5.45 (1H, dd,  $J_1 = 9.6$ ,  $J_2 = 3.2$  Hz, CH=), 4.75 (1H, s,  $\text{CH}_2$ =), 4.71 (1H, s,  $\text{CH}_2$ =), 3.95 (1H, m,  $\text{OCH}_2$ ), 3.85 (1H, m,  $\text{OCH}_2$ ), 3.79 (1H, d,  $J = 3.2$  Hz,  $\text{OCH}_2$ ), 3.51 (1H, t,  $J = 10.0$  Hz,  $\text{OCH}_2$ ), 2.74 (1H, m), 2.30 (1H, t,  $J = 10.0$  Hz), 2.04 (1H, m), 1.95 (1H, m), 1.80 (2H, m), 1.69 (3H, s), 1.60 (3H, m), 1.42–1.31 (2H, m)  $\text{ppm}$ ;  $^{13}\text{C}$  NMR (100 MHz,  $\text{CDCl}_3$ ):  $\delta$  146.8, 131.7, 128.7, 111.5, 84.5, 73.6,

60.5, 52.2, 50.9, 45.0, 38.8, 32.7, 31.9, 24.0, 19.1 *ppm*; HRMS (ESI) *m/z*: calcd for C<sub>15</sub>H<sub>26</sub>O<sub>2</sub>N 252.1958, found for [M+NH<sub>4</sub>]<sup>+</sup> 252.1952

**29**: *R<sub>f</sub>* = 0.56 (PET : AcOEt = 1 : 2); IR (film): *v*<sub>max</sub> 3380, 2952, 2878, 1710, 1450, 1374, 1222, 1049, 888, 731, 574, 520 cm<sup>-1</sup>; <sup>1</sup>H NMR (400 MHz, CDCl<sub>3</sub>): δ 5.90 (1H, m, CH=), 5.60 (1H, d, *J* = 7.6 Hz, CH=), 4.80 (1H, s, CH<sub>2</sub>=), 4.77 (1H, s, CH<sub>2</sub>=), 4.22 (1H, d, *J* = 5.6 Hz, OCH), 3.70–3.50 (4H, m, OCH<sub>2</sub>), 2.58–2.51 (2H, m), 2.10–1.59 (12H, m) *ppm*; <sup>13</sup>C NMR (100 MHz, CDCl<sub>3</sub>): δ 147.8, 136.2, 128.1, 112.4, 72.3, 67.7, 63.1, 57.1, 55.0, 46.8, 46.7, 36.9, 30.3, 22.4, 21.5 *ppm*; HRMS (ESI) *m/z*: calcd for C<sub>15</sub>H<sub>23</sub>O<sub>2</sub> 235.1693, found for [M+H]<sup>+</sup> 235.1689

### 15. Hydrogenation of compound **28** and derivatization

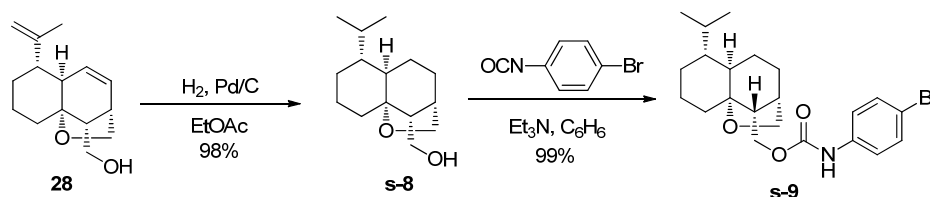

To a solution of **28** (234 mg, 1.00 mmol) in EtOAc (20 mL) was added 10% Pd/C (28 mg) at room temperature. The reaction flask was evacuated and recharged with H<sub>2</sub> for three times by a H<sub>2</sub> balloon. After 5 h under H<sub>2</sub> atmosphere, the suspension was filtered through Celite and washed with EtOAc. The filtrate was concentrated in vacuo. The residue was purified by flash column chromatography (PET : EtOAc = 2 : 1) to give compound **s-8** (234 mg, 98%) as a colorless oil. *R<sub>f</sub>* = 0.56 (PET : EtOAc = 1 : 2); IR (film): *v*<sub>max</sub> 3417, 2929, 2868, 1741, 1462, 1367, 1179, 1072, 1031, 987, 959, 894, 843, 794, 656, 554 cm<sup>-1</sup>; <sup>1</sup>H NMR (400 MHz, CDCl<sub>3</sub>): δ 3.93 (1H, m, OCH<sub>2</sub>), 3.78 (2H, m, OCH<sub>2</sub>), 3.43 (1H, t, *J* = 10.0 Hz, OCH<sub>2</sub>), 2.52 (1H, br. s, CH), 2.21 (1H, dd, *J*<sub>1</sub> = 9.2, *J*<sub>2</sub> = 5.2 Hz, CH), 1.96–1.35 (13H, m, 3CH & 5CH<sub>2</sub>), 0.90 (3H, d, *J* = 6.8 Hz, Me), 0.69 (3H, d, *J* = 6.8 Hz, Me) *ppm*; <sup>13</sup>C NMR (100 MHz, CDCl<sub>3</sub>): δ 86.2, 69.2, 60.5, 48.0, 47.4, 42.9, 37.8, 32.9, 28.1, 27.2, 24.0, 23.8, 21.6, 18.8, 14.8 *ppm*; HRMS (ESI) *m/z*: calcd for C<sub>15</sub>H<sub>27</sub>O<sub>2</sub> 239.2006, found for [M+H]<sup>+</sup> 239.2003

To a solution of compound **s-8** (22 mg, 0.09 mmol) in dry benzene (1 mL) was added 4-bromophenylisocyanate (22 mg, 0.11 mmol) at 0 °C under room temperature, stirred overnight and quenched with 2 mL of H<sub>2</sub>O. The reaction mixture was extracted with ether, the organic layer was washed successively with water and brine, dried (Na<sub>2</sub>SO<sub>4</sub>), and concentrated in vacuo. The residue was purified by flash column chromatography (PET : EtOAc = 10 : 1) to give the corresponding carbamate **s-9** (38 mg, 99%) as colorless solids. *R<sub>f</sub>* = 0.65 (PET : EtOAc = 3 : 1); mp. 138–140 °C; IR (film): *v*<sub>max</sub> 3295, 2955, 2872, 1727, 1534, 1396, 1305, 1222, 1048, 1007, 894, 825, 668, 504 cm<sup>-1</sup>; <sup>1</sup>H NMR (400 MHz, CDCl<sub>3</sub>): δ 7.40 (2H, d, *J* = 8.8 Hz, ArH), 7.29 (2H, d, *J* = 8.4 Hz, ArH), 6.78 (1H, s, NH), 4.34 (1H, m, OCH<sub>2</sub>), 3.96 (2H, m, OCH<sub>2</sub>), 3.84 (1H, d, *J* = 8.4 Hz, OCH<sub>2</sub>), 2.40 (2H, m), 1.96 (1H, m), 1.70 (4H, m), 1.60 (1H, m), 1.50–0.87 (8H, m), 0.90 (3H, d, *J* = 7.2 Hz, Me), 0.69 (3H, d, *J* = 6.8 Hz, Me) *ppm*; <sup>13</sup>C NMR (100 MHz, CDCl<sub>3</sub>): δ 153.4, 137.0, 132.0 (2C), 120.2, 116.0, 86.1, 69.1, 63.5, 47.9, 44.5, 42.8, 38.2, 33.0, 27.8, 27.2, 23.9, 23.7, 21.5, 18.7, 14.8 *ppm*

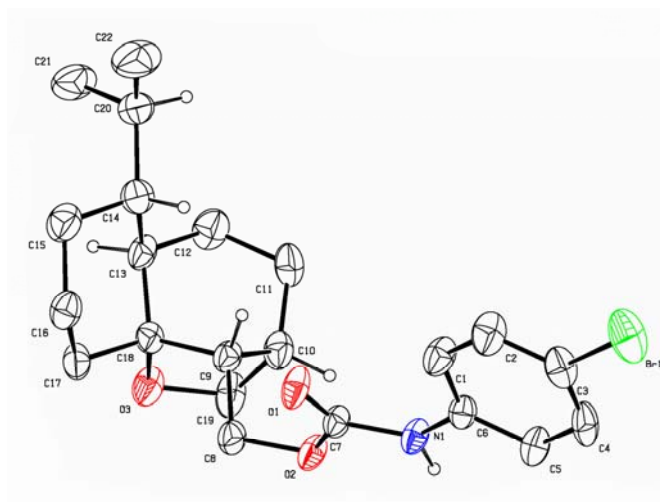

*X-ray crystallographic data of Compound s-9*

|                                            |                                                     |
|--------------------------------------------|-----------------------------------------------------|
| Empirical formula                          | C <sub>22</sub> H <sub>30</sub> Br N O <sub>3</sub> |
| Formula weight                             | 436.38                                              |
| Temperature (K)                            | 296(2)                                              |
| Wavelength (Å)                             | 0.71073                                             |
| Crystal system                             | Orthorhombic                                        |
| space group                                | Pbca                                                |
| Unit cell dimensions                       | a = 14.528(2) Å    α = 90°                          |
|                                            | b = 13.544(2) Å    β = 90°                          |
|                                            | c = 21.691(3) Å    γ = 90°                          |
| Volume (Å <sup>3</sup> )                   | 4268.2(10)                                          |
| Z                                          | 8                                                   |
| Calculated density (Mg/m <sup>3</sup> )    | 1.358                                               |
| Absorption coefficient (mm <sup>-1</sup> ) | 1.947                                               |
| Crystal size (mm <sup>3</sup> )            | 0.22 x 0.27 x 0.29                                  |
| Diffractometer                             | Bruker APEX-II CCD                                  |
| θ range                                    | 1.88 to 25.20°                                      |
| Reflections collected / unique             | 21606 / 3848                                        |
| R <sub>int</sub>                           | 0.0736                                              |
| Data / restraints / parameters             | 3848 / 0 / 250                                      |
| Goodness-of-fit on F <sup>2</sup>          | 1.031                                               |
| R <sub>1</sub> (I > 2σ(I))                 | 0.0772                                              |
| WR <sub>2</sub> (all data)                 | 0.2495                                              |

*16. Hydrogenation of compound 29 and derivatization*

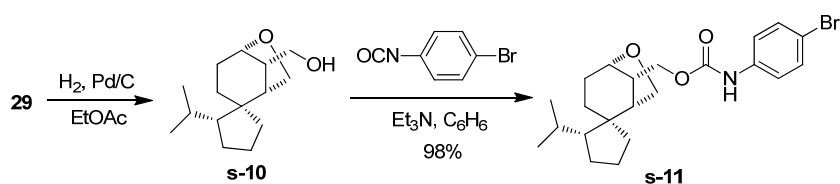



To a solution of **29** (60 mg) in EtOAc (10 mL) was added 10% Pd/C (15 mg) at room temperature. The reaction flask was evacuated and recharged with H<sub>2</sub> for three times by a H<sub>2</sub> balloon. After 3 h under H<sub>2</sub> atmosphere, the suspension was filtered through Celite and washed with EtOAc. The filtrate was concentrated in vacuo. The residue was purified by flash column chromatography (PET : EtOAc = 2 : 1) to give compound **s-10** (60 mg, 98%) as a colorless oil. *R*<sub>f</sub> = 0.54 (PET : EtOAc = 1 : 2); IR (film):  $\nu_{\max}$  3404, 2952, 2873, 1742, 1461, 1368, 1206, 1171, 1055, 1030, 861, 490 cm<sup>-1</sup>; <sup>1</sup>H NMR (400 MHz, CDCl<sub>3</sub>):  $\delta$  4.20 (1H, d, *J* = 4.4 Hz, OCH), 3.89 (1H, d, *J* = 4.8 Hz, OCH<sub>2</sub>), 3.71 (2H, m, OCH<sub>2</sub>), 3.56 (1H, m, OCH<sub>2</sub>), 3.48 (1H, m, OCH<sub>2</sub>), 2.18 (1H, t, *J* = 7.2 Hz), 1.90 (2H, m), 1.74 (3H, m), 1.50 (8H, m), 0.92 (3H, d, *J* = 6.0 Hz, Me), 0.86 (3H, d, *J* = 6.0 Hz, Me) ppm; <sup>13</sup>C NMR (100 MHz, CDCl<sub>3</sub>):  $\delta$  75.7, 68.6, 63.3, 49.7, 49.6, 48.2, 47.2, 39.0, 32.1, 27.4, 25.2, 24.6, 24.2, 21.9, 18.2 ppm; HRMS (ESI) calcd for C<sub>15</sub>H<sub>27</sub>O<sub>2</sub> 239.2006, found for [M+H]<sup>+</sup> 239.2007

Compound **s-11** was prepared similarly as for **s-9** in 98% yield as colorless solids. *R*<sub>f</sub> = 0.65 (PET : EtOAc = 3 : 1); mp. 122–124 °C; IR (film):  $\nu_{\max}$  3250, 2955, 2874, 1735, 1597, 1540, 1488, 1307, 1228, 1069, 974, 855, 821, 751, 504 cm<sup>-1</sup>; <sup>1</sup>H NMR (400 MHz, CDCl<sub>3</sub>):  $\delta$  7.40 (2H, d, *J* = 8.4 Hz, ArH), 7.28 (2H, m, ArH), 6.74 (1H, br s, NH), 4.19 (1H, d, *J* = 4.0 Hz, OCH), 4.05 (2H, m, OCH<sub>2</sub>), 3.78 (1H, d, *J* = 9.2 Hz, OCH<sub>2</sub>), 3.76 (1H, m, OCH<sub>2</sub>), 2.35 (1H, t, *J* = 7.6 Hz), 1.93–1.25 (13H, m), 0.91 (3H, d, *J* = 6.8 Hz, Me), 0.85 (3H, d, *J* = 6.8 Hz, Me) ppm; <sup>13</sup>C NMR (100 MHz, CDCl<sub>3</sub>):  $\delta$  153.3, 137.0, 132.0 (2C), 120.0, 116.0, 75.7, 68.5, 65.5, 49.9, 49.6, 47.4, 45.1, 39.1, 32.0, 27.4, 25.1, 24.8, 24.3, 21.9, 18.2 ppm

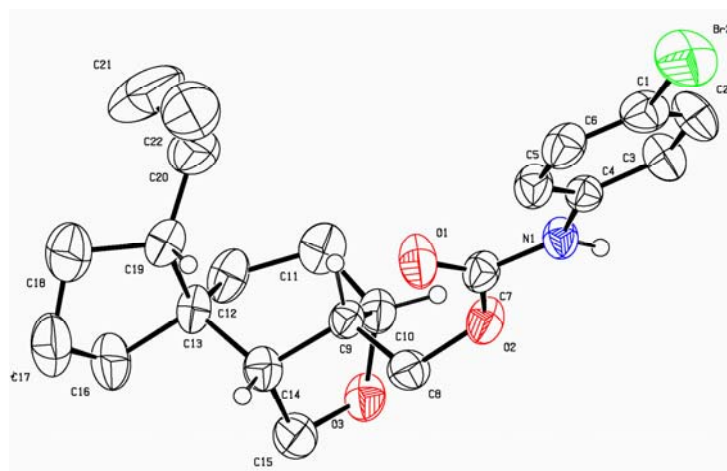

*X-ray crystallographic data of Compound s-11*

|                      |                                                     |
|----------------------|-----------------------------------------------------|
| Empirical formula    | C <sub>22</sub> H <sub>30</sub> Br N O <sub>3</sub> |
| Formula weight       | 436.38                                              |
| Temperature (K)      | 296(2)                                              |
| Wavelength (Å)       | 0.71073                                             |
| Crystal system       | Triclinic                                           |
| space group          | P1                                                  |
| Unit cell dimensions | <i>a</i> = 6.460(9) Å $\alpha$ = 83.627(7)°         |
|                      | <i>b</i> = 12.2690(17) Å $\beta$ = 81.274(7)°       |
|                      | <i>c</i> = 13.6975(18) Å $\gamma$ = 79.700(8)°      |

|                                            |                    |
|--------------------------------------------|--------------------|
| Volume (Å <sup>3</sup> )                   | 1052.5(2)          |
| Z                                          | 2                  |
| Calculated density (Mg/m <sup>3</sup> )    | 1.377              |
| Absorption coefficient (mm <sup>-1</sup> ) | 1.974              |
| Crystal size (mm <sup>3</sup> )            | 0.32 x 0.31 x 0.14 |
| Diffractometer                             | Bruker APEX-II CCD |
| θ range                                    | 2.36 to 21.16°     |
| Reflections collected / unique             | 6003 / 4083        |
| R <sub>int</sub>                           | 0.0239             |
| Data / restraints / parameters             | 4083 / 0 / 250     |
| Goodness-of-fit on F <sup>2</sup>          | 1.011              |
| R <sub>1</sub> (I>2σ(I))                   | 0.0573             |
| WR <sub>2</sub> (all data)                 | 0.1747             |

### 17. Dihydroxylation of compound **s-12**

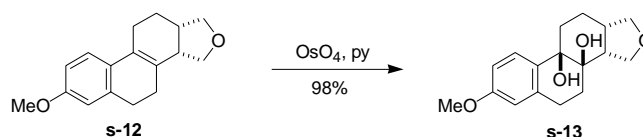

To a solution of compound **s-12** (32 mg, 0.125 mmol) in dry pyridine (0.5 mL) was added OsO<sub>4</sub> (10 mg) at 0 °C under N<sub>2</sub>. After stirred for 1 h, the reaction mixture was quenched with 2 mL of saturated NaHSO<sub>3</sub>, extracted with ether, the organic layer was washed successively with water and brine, dried (Na<sub>2</sub>SO<sub>4</sub>), and concentrated in vacuo. The residue was purified by flash column chromatography (PET : EtOAc = 2 : 1) to give **s-13** (40 mg, 98%) as white solids. *R<sub>f</sub>* = 0.10 (PET : AcOEt = 1 : 2); IR (film): ν<sub>max</sub> 3427, 2932, 2868, 1609, 1499, 1252, 1052, 928, 910, 876, 732, 650 cm<sup>-1</sup>; <sup>1</sup>H NMR (300 MHz, CDCl<sub>3</sub>): δ 7.49 (1H, d, *J* = 9 Hz, ArH), 6.79 (1H, d, *J* = 9 Hz, ArH), 6.59 (1H, s, ArH), 3.96 (1H, d, *J* = 9 Hz, OCH<sub>2</sub>), 3.88 (2H, q, *J* = 8.4 Hz, OCH<sub>2</sub>), 3.80 (3H, s, OMe), 3.47 (1H, t, *J* = 8.1 Hz, OCH<sub>2</sub>), 3.02 (1H, m), 2.58 (4H, m), 2.26 (1H, s), 2.20 (1H, m), 2.00 (4H, m), 1.46 (1H, m) ppm; <sup>13</sup>C NMR (75 MHz, CDCl<sub>3</sub>): δ 158.6, 136.1, 134.1, 128.0, 113.2, 112.4, 73.4, 72.8, 70.5, 69.1, 55.2, 47.0, 37.6, 34.2, 28.3, 25.4, 19.2 ppm; HRMS (ESI) *m/z*: calcd for C<sub>17</sub>H<sub>21</sub>O<sub>3</sub> 273.1485, found for [M-H<sub>2</sub>O+H]<sup>+</sup> 273.1478

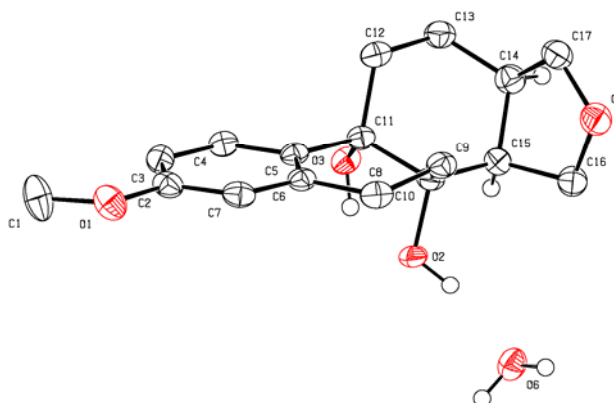

*X-ray crystallographic data of Compound **s-13***

|                                            |                                                |
|--------------------------------------------|------------------------------------------------|
| Empirical formula                          | C <sub>17</sub> H <sub>24</sub> O <sub>5</sub> |
| Formula weight                             | 308.36                                         |
| Temperature (K)                            | 113(2)                                         |
| Wavelength (Å)                             | 0.71070                                        |
| Crystal system                             | Monoclinic                                     |
| space group                                | P21/c                                          |
| Unit cell dimensions                       | a = 10.137(9) Å    α = 90°                     |
|                                            | b = 7.272(7) Å    β = 99.252(11)°              |
|                                            | c = 20.597(19) Å    γ = 90°                    |
| Volume (Å <sup>3</sup> )                   | 1499(2)                                        |
| Z                                          | 4                                              |
| Calculated density (Mg/m <sup>3</sup> )    | 1.367                                          |
| Absorption coefficient (mm <sup>-1</sup> ) | 0.100                                          |
| Crystal size (mm <sup>3</sup> )            | 0.14 x 0.14 x 0.16                             |
| θ range                                    | 2.00 to 26.49°                                 |
| Reflections collected / unique             | 13868 / 3007                                   |
| R <sub>int</sub>                           | 0.0963                                         |
| Data / restraints / parameters             | 3007 / 4 / 218                                 |
| Goodness-of-fit on F <sup>2</sup>          | 1.019                                          |
| Extinction coefficient                     | 0.032(5)                                       |
| R <sub>1</sub> (I > 2σ(I))                 | 0.0646                                         |
| WR <sub>2</sub> (all data)                 | 0.2138                                         |

### 18. Cyclization of compound **14a**

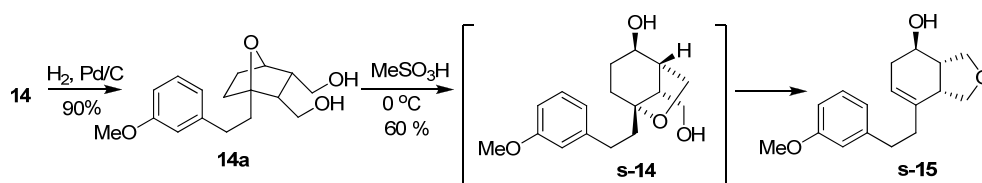

Compound **14a** was prepared by routine catalytic hydrogenation similarly as for compound **18** in 90% yield as a colorless oil.  $R_f = 0.20$  (PET : AcOEt = 1 : 2); IR (film):  $\nu_{\max}$  3357, 2938, 1603, 1490, 1457, 1316, 1259, 1155, 1044, 966, 902, 785, 699, 572, 460 cm<sup>-1</sup>; <sup>1</sup>H NMR (400 MHz, CDCl<sub>3</sub>): δ 7.20 (1H, t,  $J = 7.6$  Hz, ArH), 6.72 (3H, m, ArH), 4.42 (1H, t,  $J = 5.2$  Hz, OCH), 4.07 (1H, br. s, OH), 3.82 (2H, m, OCH<sub>2</sub>), 3.78 (3H, s, OMe), 3.59 (2H, m, OCH<sub>2</sub>), 2.76 (2H, m, CH<sub>2</sub>), 2.60 (1H, m, CH<sub>2</sub>), 2.30 (1H, m, CH<sub>2</sub>), 2.05 (2H, m, CH), 1.68 (1H, m, CH<sub>2</sub>), 1.53 (1H, m, CH<sub>2</sub>), 1.44 (2H, m, CH<sub>2</sub>) ppm; <sup>13</sup>C NMR (100 MHz, CDCl<sub>3</sub>): δ 159.6, 143.7, 129.3, 120.6, 113.9, 111.1, 87.9, 78.0, 59.8, 59.7, 55.1, 48.4, 46.4, 36.0, 30.5, 28.8, 26.1 ppm; HRMS (ESI)  $m/z$ : calcd for C<sub>17</sub>H<sub>28</sub>O<sub>4</sub>N 310.2013, found for [M+NH<sub>4</sub>]<sup>+</sup> 310.2017

To a solution of compound **14a** (70 mg, 0.24 mmol) in dry CH<sub>2</sub>Cl<sub>2</sub> (2 mL) was added MeSO<sub>3</sub>H (50 mg, 0.5 mmol) at 0 °C under N<sub>2</sub>. After stirring for 1 h, the reaction mixture was quenched with 1 mL of H<sub>2</sub>O, extracted with EtOAc, the organic layer was washed successively with water and brine, dried (Na<sub>2</sub>SO<sub>4</sub>), and concentrated in vacuo. The residue was purified by flash column chromatography (PET : EtOAc = 1 : 2) to give **s-14** (48 mg, 60%) as a colorless oil.

$R_f = 0.15$  (PET : AcOEt = 1 : 2); IR (film):  $\nu_{\max}$  3369, 2931, 1707, 1603, 1490, 1456, 1259, 1153, 1042, 1021, 970, 872, 783, 695, 572  $\text{cm}^{-1}$ ;  $^1\text{H}$  NMR (400 MHz,  $\text{CDCl}_3$ ):  $\delta$  7.18 (1H, t,  $J = 7.6$  Hz, ArH), 6.73 (3H, m, ArH), 4.03 (1H, br. s, OCH), 3.93-3.82 (2H, m,  $\text{OCH}_2$ ), 3.78 (3H, s), 3.66 (1H, d,  $J = 8.4$  Hz,  $\text{OCH}_2$ ), 3.40 (1H, t,  $J = 10.0$  Hz,  $\text{OCH}_2$ ), 2.62 (3H, m), 2.52 (1H, m), 1.97 (1H, m), 1.80 (2H, m), 1.60 (2H, m) *ppm*;  $^{13}\text{C}$  NMR (100 MHz,  $\text{CDCl}_3$ ):  $\delta$  159.6, 143.8, 129.3, 120.6, 114.1, 111.0, 84.3, 69.2, 68.5, 60.0, 55.1, 45.0, 44.8, 37.2, 32.7, 31.2, 27.0 *ppm*; HRMS (ESI)  $m/z$ : calcd for  $\text{C}_{17}\text{H}_{28}\text{O}_4\text{N}$  310.2013, found for  $[\text{M}+\text{NH}_4]^+$  310.2009

Compound **s-14** was converted to compound **s-15** if the above cyclization reaction mixture was stirred at room temperature for 4 h, which can be isolated by routine purification procedures as a colorless gum. **s-15**:  $R_f = 0.35$  (PET : EtOAc = 1 : 2); IR (film):  $\nu_{\max}$  3408, 2926, 2869, 1601, 1587, 1489, 1455, 1436, 1259, 1153, 1053  $\text{cm}^{-1}$ ;  $^1\text{H}$  NMR (400 MHz,  $\text{CDCl}_3$ ):  $\delta$  7.20 (1H, t,  $J = 8.0$  Hz, ArH), 6.75 (3H, m, ArH), 5.41 (1H, q,  $J = 1.2$  Hz, CH=), 4.08 (1H, m,  $\text{OCH}_2$ ), 4.02 (1H, m,  $\text{OCH}_2$ ), 3.93 (1H, m,  $\text{OCH}_2$ ), 3.79 (3H, s, OMe), 3.68 (1H, m, OCH), 3.41 (1H, t,  $J = 8.4$  Hz,  $\text{OCH}_2$ ), 2.87 (1H, m), 2.68 (2H, m), 2.32 (1H, m), 2.09 (3H, m), 2.04 (2H, m) *ppm*;  $^{13}\text{C}$  NMR (100 MHz,  $\text{CDCl}_3$ ):  $\delta$  159.6, 143.4, 136.8, 129.3, 120.6, 119.1, 114.4, 111.1, 72.3, 71.0, 67.2, 55.1, 45.3, 43.5, 37.7, 34.0, 33.5 *ppm*

#### 19. Spectroscopic data of intermediates **18a~f**

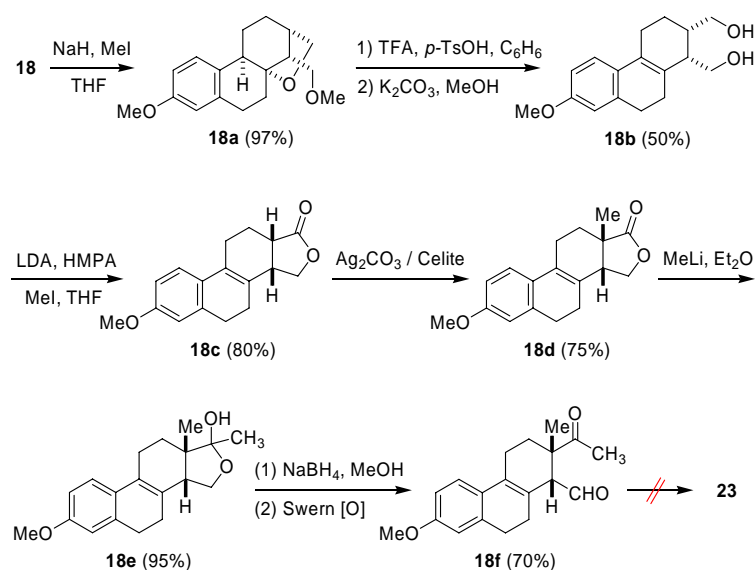

Compound **18a**:  $R_f = 0.70$  (PET : EtOAc = 2 : 1); IR (film):  $\nu_{\max}$  2926, 1740, 1608, 1498, 1460, 1240, 1038, 975, 917, 790  $\text{cm}^{-1}$ ;  $^1\text{H}$  NMR (300 MHz,  $\text{CDCl}_3$ ):  $\delta$  7.16 (1H, d,  $J = 8.7$  Hz), 6.66 (2H, m), 4.01 (1H, m), 3.95 (1H, m), 3.77 (3H, s), 3.48 (1H, m), 3.29 (3H, m), 3.07 (1H, d,  $J = 8.7$  Hz), 3.01 (1H, m), 2.88 (1H, d,  $J = 6.6$  Hz), 2.43 (1H, br s), 2.18 (2H, m), 1.96 (3H, m), 1.50 (1H, m) *ppm*;  $^{13}\text{C}$  NMR (75 MHz,  $\text{CDCl}_3$ ):  $\delta$  157.5, 137.5, 130.7, 125.5, 113.7, 111.4, 84.4, 71.3, 70.1, 58.8, 55.1, 45.9, 45.1, 38.3, 29.4, 28.7, 27.4, 20.2 *ppm*

Compound **18b**:  $R_f = 0.25$  (PET : AcOEt = 1 : 2); mp. 132~135  $^\circ\text{C}$ ; IR (film):  $\nu_{\max}$  3337, 2924, 2876, 1608, 1498, 1428, 1250, 1155, 1034, 809  $\text{cm}^{-1}$ ;  $^1\text{H}$  NMR (300 MHz,  $\text{CDCl}_3$ ):  $\delta$  7.10 (1H, d,  $J = 8.4$  Hz), 6.68 (2H, m), 3.78 (3H, s), 3.75 (4H, m), 3.56 (2H, s, br.), 2.68 (2H, m), 2.50 (1H, m),

2.40 (2H, m), 2.30 (2H, m), 2.05 (2H, m), 1.63 (2H, m) *ppm*;  $^{13}\text{C}$  NMR (75 MHz,  $\text{CDCl}_3$ ):  $\delta$  158.1, 137.4, 130.4, 128.8, 128.6, 123.0, 113.3, 110.8, 65.3, 61.3, 55.2, 44.6, 38.8, 29.1, 28.3, 25.4, 21.2 *ppm*; HRMS (ESI) calcd for  $\text{C}_{17}\text{H}_{22}\text{O}_3\text{Na}$  297.1461, found for  $[\text{M}+\text{Na}]^+$  297.1460

Compound **18c**:  $R_f = 0.45$  (PET : AcOEt = 2 : 1); mp. 93–95 °C; IR (film):  $\nu_{\text{max}}$  2928, 1770, 1608, 1499, 1252, 1153, 1043, 1021, 986, 813, 730, 610  $\text{cm}^{-1}$ ;  $^1\text{H}$  NMR (300 MHz,  $\text{CDCl}_3$ ):  $\delta$  7.10 (1H, d,  $J = 8.4$  Hz), 6.72 (2H, m), 4.43 (1H, t,  $J = 7.2$  Hz), 4.16 (1H, m), 3.81 (3H, s), 3.21 (1H, s, br.), 2.83 (1H, m), 2.70 (2H, m), 2.05–2.40 (6H, m), 1.85 (1H, m) *ppm*;  $^{13}\text{C}$  NMR (75 MHz,  $\text{CDCl}_3$ ):  $\delta$  178.8, 158.4, 136.8, 130.2, 128.5, 127.0, 123.4, 113.4, 110.9, 70.6, 55.2, 40.1, 38.3, 28.4, 26.8, 22.0, 20.4 *ppm*; HRMS (ESI) calcd for  $\text{C}_{17}\text{H}_{22}\text{O}_3\text{N}$  288.1594, found for  $[\text{M}+\text{NH}_4]^+$  288.1591

Compound **18d**:  $R_f = 0.48$  (PET : AcOEt = 2 : 1); IR (film):  $\nu_{\text{max}}$  2924, 1768, 1608, 1499, 1457, 1431, 1304, 1252, 1156, 1091, 1021, 866, 813  $\text{cm}^{-1}$ ;  $^1\text{H}$  NMR (300 MHz,  $\text{CDCl}_3$ ):  $\delta$  7.13 (1H, d,  $J = 8.4$  Hz), 6.72 (2H, m), 4.51 (1H, t,  $J = 7.8$  Hz), 4.10 (1H, t,  $J = 7.2$  Hz), 3.80 (3H, s), 2.72 (3H, m), 2.40 (2H, br s), 1.98–2.23 (3H, m), 1.70 (1H, m), 1.25 (3H, s) *ppm*;  $^{13}\text{C}$  NMR (75 MHz,  $\text{CDCl}_3$ ):  $\delta$  181.4, 158.4, 136.7, 128.6, 128.2, 127.1, 123.3, 113.4, 110.9, 69.7, 55.1, 47.1, 40.9, 28.4, 27.6, 27.1, 21.7, 21.3 *ppm*; HRMS (ESI) calcd for  $\text{C}_{18}\text{H}_{24}\text{O}_3\text{N}$  302.1751, found for  $[\text{M}+\text{NH}_4]^+$  302.1747

Compound **18e**:  $R_f = 0.30$  (PET : EtOAc = 2 : 1); mp. 122–127 °C; IR (film):  $\nu_{\text{max}}$  3386, 2932, 2882, 1608, 1571, 1499, 1464, 1381, 1252, 1153, 1105, 1038, 1010, 929, 871, 813, 732, 644  $\text{cm}^{-1}$ ;  $^1\text{H}$  NMR (400 MHz,  $\text{CDCl}_3$ ):  $\delta$  7.15 (1H, d,  $J = 8.4$  Hz), 6.69 (2H, m), 4.33 (1H, t,  $J = 8.0$  Hz), 3.80 (3H, s), 3.62 (1H, t,  $J = 8.0$  Hz), 2.73 (3H, m), 2.41 (3H, br s), 2.20 (1H, m), 2.09 (1H, m), 1.58 (2H, m), 1.39 (3H, s), 1.03 (3H, s) *ppm*;  $^{13}\text{C}$  NMR (100 MHz,  $\text{CDCl}_3$ ):  $\delta$  158.0, 136.9, 130.7, 128.8, 124.8, 123.0, 113.5, 110.9, 108.3, 71.7, 55.2, 47.6, 44.9, 28.7, 27.3, 22.4, 21.4, 16.8 *ppm*

Compound **18f**:  $R_f = 0.30$  (PET : EtOAc = 3 : 1); IR (film):  $\nu_{\text{max}}$  2934, 2835, 1707, 1608, 1571, 1450, 1431, 1252, 1154, 1103, 1140, 992, 929, 877, 812, 613  $\text{cm}^{-1}$ ;  $^1\text{H}$  NMR (400 MHz,  $\text{CDCl}_3$ ):  $\delta$  9.50 (1H, d,  $J = 4.8$  Hz), 7.18 (1H, d,  $J = 11.6$  Hz), 6.73 (2H, m), 3.80 (3H, s), 2.99 (1H, s, br.), 2.73 (2H, m), 2.59 (2H, m), 2.40 (1H, m), 2.23 (3H, s), 2.18 (1H, m), 2.05 (1H, m), 1.16 (3H, s) *ppm*;  $^{13}\text{C}$  NMR (100 MHz,  $\text{CDCl}_3$ ):  $\delta$  212.7, 197.1, 158.7, 137.5, 129.9, 127.9, 123.4, 123.0, 113.5, 111.1, 60.3, 55.2, 48.9, 28.5, 27.5, 26.6, 25.1, 22.5, 20.9 *ppm*; HRMS (ESI) calcd for  $\text{C}_{19}\text{H}_{23}\text{O}_3$  299.1642, found for  $[\text{M}+\text{H}]^+$  299.1641
